# Supplementary material
Source: PubMed Central journal article supplement (PMC3004525)
Supplement: NIHMS255261-supplement-Supplementary_Figure.pdf [file NIHMS255261-supplement-Supplementary_Figure.pdf]

Supplementary Figure S1. Amino acid sequence alignment.

|                                             |            |            |            |            |            |             |
|---------------------------------------------|------------|------------|------------|------------|------------|-------------|
| Aplysia_punctata_cyplasin_L_{Mollusks}      | -----      | -----      | -----      | -----      | -----      | -----       |
| Aplysia_punctata_cyplasin_S_{Mollusks}      | -----      | -----      | -----      | -----      | -----      | -----       |
| Aplysia_californica_aplysianin_A_{Mollusks} | -----      | -----      | -----      | -----      | -----      | -----       |
| Aplysia_punctata_ink_toxin_1_{Mollusks}     | -----      | -----      | -----      | -----      | -----      | -----       |
| Aplysia_punctata_ink_toxin_2_{Mollusks}     | -----      | -----      | -----      | -----      | -----      | -----       |
| Aplysia_punctata_ink_toxin_3_{Mollusks}     | -----      | -----      | -----      | -----      | -----      | -----       |
| Aplysia_californica_escapin_{Mollusks}      | -----      | -----      | -----      | -----      | -----      | -----       |
| Achatina_fulica_achacin_{Mollusks}          | -----      | -----      | -----      | -----      | -----      | -----       |
| Hahella_chejuensis_{Proteobacteria}         | -----      | -----      | -----      | -----      | -----      | -----       |
| Pseudomonas_entomophila_{Proteobacteria}    | -----      | -----      | -----      | -----      | -----      | -----       |
| Burkholderia_ubonensis_{Proteobacteria}     | -----      | -----      | -----      | -----      | -----      | -----       |
| Chromobacterium_violaceum_{Proteobacteria}  | -----      | -----      | -----      | -----      | -----      | -----       |
| Chitinophaga_pinensis_{Bacteroidetes}       | -----      | -----      | -----      | -----      | -----      | -----       |
| Flavobacterium_johnsoniae_{Bacteroidetes}   | -----      | -----      | -----      | -----      | -----      | -----       |
| Dyadobacter_fermentans_{Bacteroidetes}      | -----      | -----      | -----      | -----      | -----      | -----       |
| Staphylococcus_aureus_{Firmicutes}          | -----      | -----      | -----      | -----      | -----      | -----       |
| Clostridium_botulinum_{Firmicutes}          | -----      | -----      | -----      | -----      | -----      | -----MN     |
| Clostridium_carboxidivorans_{Firmicutes}    | -----      | -----      | -----      | -----      | -----      | -----ME     |
| Turkey_LAO                                  | -----      | -----      | -----      | -----      | -----      | -----MA     |
| Chicken_LAO                                 | MDGLPSADTT | TITRRDISDG | FPPGDATIVT | RRDISDGFPP | GDATIMTRRD | ISHGFPPGDA  |
| Zebrafinch_LAO                              | -----      | -----      | -----      | -----      | -----      | -----MT     |
| Ophiophagus_hannah_{Elapidae}               | -----      | -----      | -----      | -----      | -----      | -----MN     |
| Crotalus_atrox_{Viperidae}                  | -----      | -----      | -----      | -----      | -----      | -----MN     |
| Sistrurus_catenatus_{Viperidae}             | -----      | -----      | -----      | -----      | -----      | -----MN     |
| Gloydeus_halys_{Viperidae}                  | -----      | -----      | -----      | -----      | -----      | -----MN     |
| Trimesurus_stejnegeri_{Viperidae}           | -----      | -----      | -----      | -----      | -----      | -----MN     |
| Bothrops_jararacussu_{Viperidae}            | -----      | -----      | -----      | -----      | -----      | -----MN     |
| Echis_ocellatus_{Viperidae}                 | -----      | -----      | -----      | -----      | -----      | -----MN     |
| Oxyuranus_scutellatus_{Elapidae}            | -----      | -----      | -----      | -----      | -----      | -----MN     |
| Pseudechis_australis_{Elapidae}             | -----      | -----      | -----      | -----      | -----      | -----MN     |
| Bungarus_multicinctus_{Elapidae}            | -----      | -----      | -----      | -----      | -----      | -----MN     |
| Demancia_vestigiata_{Elapidae}              | -----      | -----      | -----      | -----      | -----      | -----MN     |
| Dog_LAO1                                    | -----      | -----      | -----      | -----      | -----      | -----MK     |
| Panda_LAO1                                  | -----      | -----      | -----      | -----      | -----      | -----       |
| Bovine_LAO1                                 | -----      | -----      | -----      | -----      | -----      | -----MVKMR  |
| Horse_LAO1                                  | -----      | -----      | -----      | -----      | -----      | -----MK     |
| Mouse_LAO1                                  | -----      | -----      | -----      | -----      | -----      | MSFRITMAKKS |
| Opossum_LAO1                                | -----      | -----      | -----      | -----      | -----      | -----MSSLFT |
| Horse_LAO2                                  | -----      | -----      | -----      | -----      | -----      | -----MCPGWL |
| Opossum_LAO2                                | -----      | -----      | -----      | -----      | -----      | -----METLL  |
| Flounder_LAO3                               | -----      | -----      | -----      | -----      | -----      | -----MDPHVS |
| Flounder_LAO2                               | -----      | -----      | -----      | -----      | -----      | -----MDPHVS |
| Flounder_LAO1                               | -----      | -----      | -----      | -----      | -----      | -----MGAHVM |
| Rockfish_LAO                                | -----      | -----      | ---MNIMKEK | LAALETKLKA | QEGKDGKKTN | FQTEMNPHVV  |

|                                             |            |            |             |             |                  |
|---------------------------------------------|------------|------------|-------------|-------------|------------------|
| Green_pufferfish_LAO                        | -----      | -----      | -----       | -----       | -----ML          |
| Zebrafish_LAO                               | -----      | -----      | -----       | -----       | -----MLSAVL      |
| Panda_IL4I1                                 | -----      | -----      | -----       | -----       | -----P P-----ARY |
| Dog_IL4I1                                   | -----      | -----      | -----       | -----MQHHL  | -----PRIMASSVRY  |
| Human_IL4I1                                 | -----      | -----      | -----       | -----MA     | -----P-----LALH  |
| Mouse_IL4I1                                 | -----      | -----      | -----       | -----MAG    | -----LAL         |
| Streptosporangium_roseum_{Actinobacteria}   | -----      | -----      | -----       | -----       | -----            |
| Roseiflexus_castenholzii_{Chloroflexi}      | -----      | -----      | -----       | -----       | -----            |
| Bacillus_cereus_{Firmicutes}                | -----      | -----      | -----       | -----       | -----            |
| Marseillevirus                              | -----      | -----      | -----       | -----       | -----            |
|                                             |            |            |             |             |                  |
| Aplysia_punctata_cyplasin_L_{Mollusks}      | -----      | MAVRFLAPGL | LTLATLVSGR  | TVCESKQECD  | AAQCDK-----      |
| Aplysia_punctata_cyplasin_S_{Mollusks}      | -----      | MAVRFLAPGL | LTLATLVSGR  | TVCESKQECD  | AAQCDK-----      |
| Aplysia_californica_aplysianin_A_{Mollusks} | -----      | MAVRFLALGL | LIFVTVCSGR  | RVCDSQQSCD  | AEQCDK-----      |
| Aplysia_punctata_ink_toxin_1_{Mollusks}     | -----M     | SSAVLLLACA | LVISVHADG-  | -ICRNRQCN   | REVCGS-----      |
| Aplysia_punctata_ink_toxin_2_{Mollusks}     | -----      | SSAVLLLACA | LVISVHADG-  | -VCRNRQCN   | REVCGS-----      |
| Aplysia_punctata_ink_toxin_3_{Mollusks}     | -----      | -----      | -----DG-    | -ICRNRQCN   | REVCGS-----      |
| Aplysia_californica_escapin_{Mollusks}      | -----M     | SSAFLLLACA | LVISVHADG-  | -VCRNRQCN   | KEVCGS-----      |
| Achatina_fulica_achacin_{Mollusks}          | -----      | MLLLNSALFI | LCLVCWLPGT  | SSSRVLTRE   | GPQCSR-----      |
| Hahella_chejuensis_{Proteobacteria}         | -----      | -----      | -----       | -----       | -----MDNAAL----- |
| Pseudomonas_entomophila_{Proteobacteria}    | -----      | --MANWHSKG | PRQYWLVTWI  | SLPTHNKREF  | AMSHNH-----      |
| Burkholderia_ubonensis_{Proteobacteria}     | -----      | -----      | -----       | -----       | -----MADE-----   |
| Chromobacterium_violaceum_{Proteobacteria}  | -----      | -----      | -----       | -----       | -----MAEE-----   |
| Chitinophaga_pinensis_{Bacteroidetes}       | -----      | -----      | -----       | -----       | -----MANE-----   |
| Flavobacterium_johnsoniae_{Bacteroidetes}   | -----      | -MTMFMYCLN | VYPKTAINHK  | TMNKNTPLNS  | GIQPD-----       |
| Dyadobacter_fermentans_{Bacteroidetes}      | -----      | -----      | -----       | -----       | -----MKNKNTPLNN  |
| Staphylococcus_aureus_{Firmicutes}          | -----      | -----      | -----MTNR   | ITMKDIEHID  | GINKNN-----      |
| Clostridium_botulinum_{Firmicutes}          | SYNNSNSP-- | -YQIDNPGEY | ERYTMLEYIL  | KLQNRSDDDL  | NIINLM-----      |
| Clostridium_carboxidivorans_{Firmicutes}    | VYRADIQP-- | -FNPSNE--- | QRYALLKNAL  | RKSGRLGDFN  | NI IKLL-----     |
| Turkey_LAO                                  | AMVL-----  | -FQILLLLGL | ASAKRFPCFP  | EYCLHDKDYE  | ELLSIV-----      |
| Chicken_LAO                                 | TVVTRKDISG | GFPSLASRST | EGAKRFSCFP  | EYCLHDKDYE  | ELLSIV-----      |
| Zebrafinch_LAO                              | GIAL-----  | -LQILLLVGL | LSAKRFSSFP  | DYCLHQDYE   | DLLKIV-----      |
| Ophiophagus_hannah_{Elapidae}               | DFLL-----  | -LLLVLFLGV | PRSENHVINL  | EECFQEPEYE  | NWLATA-----      |
| Crotalus_atrox_{Viperidae}                  | VFFMFS---- | -LLFLAALGS | CAHDR--NPL  | EECFRET DYE | EFLEIA-----      |
| Sistrurus_catenatus_{Viperidae}             | VFFMFS---- | -LLFLAALGS | CADDR--NPL  | EECFRET DYE | EFLEIA-----      |
| Gloydeus_halys_{Viperidae}                  | VFFMFS---- | -LLFLAALGS | CANDR--NPL  | EECFRET DYE | EFLEIA-----      |
| Trimesurus_stejnegeri_{Viperidae}           | VFFMFS---- | -LLFLAALGS | CADDR--NPL  | EECFRET DYE | EFLEIA-----      |
| Bothrops_jararacussu_{Viperidae}            | VFFMF----- | -----SKPGK | LADDR--NPL  | EECFRET DYE | EFLEIA-----      |
| Echis_ocellatus_{Viperidae}                 | IFFMFS---- | -LLFLATLGS | CADDK--NPL  | EECFREADYE  | EFLEIA-----      |
| Oxyuranus_scutellatus_{Elapidae}            | VFFMFS---- | -LLFLAALGS | CADVRR--NPL | EECFREADYE  | EFLEIA-----      |
| Pseudechis_australis_{Elapidae}             | VFFMFS---- | -LLFLAALGS | CADDR--RPL  | EECFREADYE  | EFLEIA-----      |
| Bungarus_multicinctus_{Elapidae}            | VFSIFS---- | -LVFLAALGS | CADDR--SPL  | EECFREADYE  | EFLEIA-----      |
| Demancia_vestigiata_{Elapidae}              | VFFMFS---- | -LLFLAALGS | CADDR--NPL  | GECFREADYE  | EFVDIA-----      |
| Dog_LAO1                                    | GILILG---- | ---LFLATPS | CLGYF--EDL  | VKCFQDPEYE  | SILVTA-----      |
| Panda_LAO1                                  | -----      | -----      | -----       | -KCLQDPEYE  | SILVTA-----      |
| Bovine_LAO1                                 | GILILG---- | ---LFLATPS | CLGYF--EDL  | AKCFHDPEYE  | SILVTA-----      |
| Horse_LAO1                                  | GILILG---- | ---LLLATPS | CLASY--EDL  | VKCFQDPEYE  | SILVTA-----      |

|                                             |            |                 |             |            |            |       |
|---------------------------------------------|------------|-----------------|-------------|------------|------------|-------|
| Mouse_LAO1                                  | GILVWG---- | ---ILLCVSS      | CLALY--ENL  | VKCFQDPDYE | AFLLIA---- | ----- |
| Opossum_LAO1                                | GILTIA---- | ---FLLTITN      | CHGYS--KSL  | AKCFEDPEYE | AVLKIA---- | ----- |
| Horse_LAO2                                  | ALGLLS---- | ---MLSLS--      | TQAFN--SQL  | LKCLEDPQYE | ELVRLA---- | ----- |
| Opossum_LAO2                                | KMLLLS---- | ---MVLLSPY      | SHAFN--TEL  | VKCFDDPQYE | ELLGLL---- | ----- |
| Flounder_LAO3                               | KRELYVVS-  | -LLFTMYQSQ      | TAALSFRANI  | SSCLEDKDYE | TLETA----  | ----- |
| Flounder_LAO2                               | KCELGK---- | -----QQQ        | TAALSFRAHL  | ANSLEDADYE | TLLQTA---- | ----- |
| Flounder_LAO1                               | KCEIYVVS-  | -LLFTMSQSQ      | TAALSFRAHL  | SDCLEDKDYQ | TLLQTV---- | ----- |
| Rockfish_LAO                                | TWKLFVSV-  | -LLLALYPSH      | AAAIISLRDNL | ADCLEDRDYD | KLLHIA---- | ----- |
| Green_pufferfish_LAO                        | LWLLWLLP-- | -----LLGG       | ALAVGGGDRL  | SDCLQDNDYD | RLLRVV---- | ----- |
| Zebrafish_LAO                               | ALVLVSIY-- | -----HAGGTGNDLL | HAGGTGNDLL  | SKCLQSDYD  | YLLKIT---- | ----- |
| Panda_IL4I1                                 | LLVLVS---- | IFLSLVSALD      | WKTSHSQDPF  | EKCMHDPDYE | VLLKVV---- | ----- |
| Dog_IL4I1                                   | LLVLVS---- | TFLSLVGSLD      | WKTSHGQDSF  | EKCMHDPDYE | VLLKVV---- | ----- |
| Human_IL4I1                                 | LLVLVP---- | ILLSLVSQD       | WKAERSQDPF  | EKCMQDPDYE | QLLKVV---- | ----- |
| Mouse_IL4I1                                 | RLVLAA---- | TLLGLAGSLD      | WKAASSLNPI  | EKCMEDHDYE | QLLKVV---- | ----- |
| Streptosporangium_roseum_{Actinobacteria}   | -----      | -----MPAD       | PRHPRFDHAS  | LSPGHERVSP | RLVRTA---- | ----- |
| Roseiflexus_castenholzii_{Chloroflexi}      | -----      | -----MAQE       | LSTSEY----  | LDSIHRGIA- | -----A---- | ----- |
| Bacillus_cereus_{Firmicutes}                | -----      | -----MQKD       | IMYNTEMDEA  | LKVIDKGLK- | -----      | ----- |
| Marseillevirus                              | -----      | -----           | -----       | -----      | -----      | ----- |
| Aplysia_punctata_cyplasin_L_{Mollusks}      | -----      | -----           | -----       | -----      | -----      | ----- |
| Aplysia_punctata_cyplasin_S_{Mollusks}      | -----      | -----           | -----       | -----      | -----      | ----- |
| Aplysia_californica_aplysianin_A_{Mollusks} | -----      | -----           | -----       | -----      | -----      | ----- |
| Aplysia_punctata_ink_toxin_1_{Mollusks}     | -----      | -----           | -----       | -----      | -----      | ----- |
| Aplysia_punctata_ink_toxin_2_{Mollusks}     | -----      | -----           | -----       | -----      | -----      | ----- |
| Aplysia_punctata_ink_toxin_3_{Mollusks}     | -----      | -----           | -----       | -----      | -----      | ----- |
| Aplysia_californica_escapin_{Mollusks}      | -----      | -----           | -----       | -----      | -----      | ----- |
| Achatina_fulica_achacin_{Mollusks}          | -----      | -----           | -----       | -----      | -----      | ----- |
| Hahella_chejuensis_{Proteobacteria}         | -----      | -----           | -----       | -----      | -----      | ----- |
| Pseudomonas_entomophila_{Proteobacteria}    | -----      | -----           | -----       | -----      | -----      | ----- |
| Burkholderia_ubonensis_{Proteobacteria}     | -----      | -----           | -----       | -----      | -----      | ----- |
| Chromobacterium_violaceum_{Proteobacteria}  | -----      | -----           | -----       | -----      | -----      | ----- |
| Chitinophaga_pinensis_{Bacteroidetes}       | -----      | -----           | -----       | -----      | -----      | ----- |
| Flavobacterium_johnsoniae_{Bacteroidetes}   | -----      | -----           | -----       | -----      | -----      | ----- |
| Dyadobacter_fermentans_{Bacteroidetes}      | -----      | -----           | -----       | -----      | -----      | ----- |
| Staphylococcus_aureus_{Firmicutes}          | -----      | -----           | -----       | -----      | -----      | ----- |
| Clostridium_botulinum_{Firmicutes}          | -----      | -----           | -----       | -----      | -----      | ----- |
| Clostridium_carboxidivorans_{Firmicutes}    | -----      | -----           | -----       | -----      | -----      | ----- |
| Turkey_LAO                                  | -----      | -----           | -----       | -----      | -----      | ----- |
| Chicken_LAO                                 | -----      | -----           | -----       | -----      | -----      | ----- |
| Zebrafinch_LAO                              | -----      | -----           | -----       | -----      | -----      | ----- |
| Ophiophagus_hannah_{Elapidae}               | -----      | -----           | -----       | -----      | -----      | ----- |
| Crotalus_atrox_{Viperidae}                  | -----      | -----           | -----       | -----      | -----      | ----- |
| Sistrurus_catenatus_{Viperidae}             | -----      | -----           | -----       | -----      | -----      | ----- |
| Gloydeus_halys_{Viperidae}                  | -----      | -----           | -----       | -----      | -----      | ----- |
| Trimesurus_stejnegeri_{Viperidae}           | -----      | -----           | -----       | -----      | -----      | ----- |
| Bothrops_jararacussu_{Viperidae}            | -----      | -----           | -----       | -----      | -----      | ----- |
| Echis_ocellatus_{Viperidae}                 | -----      | -----           | -----       | -----      | -----      | ----- |

|                                             |             |       |            |            |            |             |
|---------------------------------------------|-------------|-------|------------|------------|------------|-------------|
| Oxyuranus_scutellatus_{Elapidae}            | -----       | ----- | -----      | -----      | -----      | -----       |
| Pseudechis_australis_{Elapidae}             | -----       | ----- | -----      | -----      | -----      | -----       |
| Bungarus_multicinctus_{Elapidae}            | -----       | ----- | -----      | -----      | -----      | -----       |
| Demancia_vestigiata_{Elapidae}              | -----       | ----- | -----      | -----      | -----      | -----       |
| Dog_LAO1                                    | -----       | ----- | -----      | -----      | -----      | -----       |
| Panda_LAO1                                  | -----       | ----- | -----      | -----      | -----      | -----       |
| Bovine_LAO1                                 | -----       | ----- | -----      | -----      | -----      | -----       |
| Horse_LAO1                                  | -----       | ----- | -----      | -----      | -----      | -----       |
| Mouse_LAO1                                  | -----       | ----- | -----      | -----      | -----      | -----       |
| Opossum_LAO1                                | -----       | ----- | -----      | -----      | -----      | -----       |
| Horse_LAO2                                  | -----       | ----- | -----      | -----      | -----      | -----       |
| Opossum_LAO2                                | -----       | ----- | -----      | -----      | -----      | -----       |
| Flounder_LAO3                               | -----       | ----- | -----      | -----      | -----      | -----       |
| Flounder_LAO2                               | -----       | ----- | -----      | -----      | -----      | -----       |
| Flounder_LAO1                               | -----       | ----- | -----      | -----      | -----      | -----       |
| Rockfish_LAO                                | -----       | ----- | -----      | -----      | -----      | -----       |
| Green_pufferfish_LAO                        | -----       | ----- | -----      | -----      | -----      | -----       |
| Zebrafish_LAO                               | -----       | ----- | -----      | -----      | -----      | -----       |
| Panda_IL4I1                                 | -----       | ----- | -----      | -----      | -----      | -----       |
| Dog_IL4I1                                   | -----       | ----- | -----      | -----      | -----      | -----       |
| Human_IL4I1                                 | -----       | ----- | -----      | -----      | -----      | -----       |
| Mouse_IL4I1                                 | -----       | ----- | -----      | -----      | -----      | -----       |
| Streptosporangium_roseum_{Actinobacteria}   | -----       | ----- | -----      | -----      | -----      | -----       |
| Roseiflexus_castenholzii_{Chloroflexi}      | -----       | ----- | -----      | -----      | -----      | -----       |
| Bacillus_cereus_{Firmicutes}                | -----       | ----- | -----      | -----      | -----      | -----       |
| Marseillevirus                              | -----       | ----- | -----      | -----      | -----      | -----       |
|                                             |             |       |            |            |            |             |
| Aplysia_punctata_cyplasin_L_{Mollusks}      | -----       | ----- | -----      | -TLDVAIVGA | GAAGAYSAYL | LRNKGQ----  |
| Aplysia_punctata_cyplasin_S_{Mollusks}      | -----       | ----- | -----      | -TLDVAIVGA | GAAGAYSAYL | LRNKGQ----  |
| Aplysia_californica_aplysianin_A_{Mollusks} | -----       | ----- | -----      | -NLDIAIVGA | GPSGAYSAYK | MRYSGK----  |
| Aplysia_punctata_ink_toxin_1_{Mollusks}     | -----       | ----- | -----      | -TYDVAVVGA | GPGGANSAYM | LRDSGL----  |
| Aplysia_punctata_ink_toxin_2_{Mollusks}     | -----       | ----- | -----      | -TYDVAVVGA | GPGGANSAYM | LRDSGL----  |
| Aplysia_punctata_ink_toxin_3_{Mollusks}     | -----       | ----- | -----      | -TYDVAVVGA | GPGGANSAYM | LRDSGL----  |
| Aplysia_californica_escapin_{Mollusks}      | -----       | ----- | -----      | -SYDVAIVGA | GPGGANSAYM | LRESGL----  |
| Achatina_fulica_achacin_{Mollusks}          | -----       | ----- | -----      | -SVDVAIVGA | GPSGTYSAYK | LRNKGQ----  |
| Hahella_chejuensis_{Proteobacteria}         | -----       | ----- | -----      | -TLDVAIVGG | GVSGVYSAWR | LQTECG-AQQ  |
| Pseudomonas_entomophila_{Proteobacteria}    | -----       | ----- | -----      | -PLDVAIIGG | GVSGTYSAWR | LQQAHG-THQ  |
| Burkholderia_ubonensis_{Proteobacteria}     | -----       | ----- | -----      | -LIDIAIVGA | GVSGVYSAWR | LQQAD--ARR  |
| Chromobacterium_violaceum_{Proteobacteria}  | -----       | ----- | -----      | -TFDIAIVGG | GVSGVYCAWR | LKQTY--PGK  |
| Chitinophaga_pinensis_{Bacteroidetes}       | -----       | ----- | -----      | -QIDIAIIGG | GVSGVYSAWK | LKKQF--PDQ  |
| Flavobacterium_johnsoniae_{Bacteroidetes}   | -----       | ----- | -----      | -KIETAIIGA | GTSGLYTAYR | LVTDKKYTAD  |
| Dyadobacter_fermentans_{Bacteroidetes}      | -----       | ----- | -----      | -ETEVAIIGA | GTSGLYSAFR | LTEVGKYTGS  |
| Staphylococcus_aureus_{Firmicutes}          | -----       | ----- | -----      | -EVDIAIIGA | GVSGLYSAYR | FLEDPPQYSQQ |
| Clostridium_botulinum_{Firmicutes}          | SPPEEDIT--- | ----- | --NICKAGMA | KNIKVAVIGA | GEAGLASAFE | LRKIGC----  |
| Clostridium_carboxidivorans_{Firmicutes}    | GPPPDIL---  | ----- | --NYAYPGEF | KKIKVGIIGG | GLAGMSAAFE | LRKLGf----  |
| Turkey_LAO                                  | KNGLE----   | ----- | ---PTTR--- | -PSKVIVGA  | GISGLTAAKL | LRDAGH----  |
| Chicken_LAO                                 | KYGLE----   | ----- | ---PTTR--- | -PSNVIVGA  | GISGLTAAKL | LRDAGH----  |

|                                             |            |             |              |            |            |            |
|---------------------------------------------|------------|-------------|--------------|------------|------------|------------|
| Zebrafinch_LAO                              | QEGLE----  | -----       | ---PAAR---   | -PARVAVVGA | GVAGLTAAKL | LRDAGH---- |
| Ophiophagus_hannah_{Elapidae}               | SHGLT----  | -----       | ---KTLN---   | -PKKIVVGA  | GISGLTAAKL | FREAGH---- |
| Crotalus_atrox_{Viperidae}                  | KNGLT----  | -----       | ---ATSN---   | -PKRVVIVGA | GMAGLSAAYV | LAGAGH---- |
| Sistrurus_catenatus_{Viperidae}             | KNGLT----  | -----       | ---ATSN---   | -PKRVVIVGA | GMSGLSAAYV | LAGAGH---- |
| Gloydeus_halys_{Viperidae}                  | RNGLK----  | -----       | ---ATSN---   | -PKHVVVVGA | GMSGLSAAYV | LSGAGH---- |
| Trimesurus_stejnegeri_{Viperidae}           | RNGLK----  | -----       | ---ATSN---   | -PKRVVIVGA | GMSGLSAAYV | LAGTGH---- |
| Bothrops_jararacussu_{Viperidae}            | KNGLS----  | -----       | ---TTSN---   | -PKRVVIVGA | GMSGLSAAYV | LANAGH---- |
| Echis_ocellatus_{Viperidae}                 | KNGLK----  | -----       | ---KTSN---   | -PKDIVVVGA | GMSGLSAAYV | LAGAGH---- |
| Oxyuranus_scutellatus_{Elapidae}            | RNGLK----  | -----       | ---KTSN---   | -PKHVVVVGA | GMAGLSAAYV | LAGAGH---- |
| Pseudechis_australis_{Elapidae}             | KNGLQ----  | -----       | ---RTSN---   | -PKRVVVVGA | GMAGLSAAYV | LAGAGH---- |
| Bungarus_multicinctus_{Elapidae}            | RNGLK----  | -----       | ---KTSN---   | -PKHVVVVGA | GMAGLSAAYV | LEKAGH---- |
| Demancia_vestigiata_{Elapidae}              | TNGLK----  | -----       | ---QTSN---   | -PKRVVVVGA | GMAGLSAAYV | LAGAGH---- |
| Dog_LAO1                                    | QEGHL----- | -----       | ---TSP-----  | -TKRVIVVGA | GMSGLAAAKA | LQDAGH---- |
| Panda_LAO1                                  | QEGHL----- | -----       | ---TSP-----  | -PKRVVIVGA | GMSGLVAAKA | LQDAGH---- |
| Bovine_LAO1                                 | QEGHL----- | -----       | ---TSPV----- | -PKRIVVVGA | GMSGLTAAKA | LQDAGH---- |
| Horse_LAO1                                  | QEGHL----- | -----       | ---ISRL----- | -PKRVVVVGA | GMSGLAAAKA | LQDAGH---- |
| Mouse_LAO1                                  | QNGHL----- | -----       | ---TSP-----  | -SKRVVVVGA | GMAGLVAAKT | LQDAGH---- |
| Opossum_LAO1                                | QEGLG----- | -----       | ---TSAI----- | -RKHIVVVGA | GMSGLIAAKT | LQEAGH---- |
| Horse_LAO2                                  | QDGLR----- | -----       | ---QTAE----- | -RKQVVVIGA | GMAGLTAAKT | LQDAGH---- |
| Opossum_LAO2                                | QGGGL----- | -----       | ---APIE----- | -KKSVVVIGA | GIAGLTAAKV | LQDAGH---- |
| Flounder_LAO3                               | KTGLP----- | -----       | ---PTHT----- | -PHHVVVVGA | GMAGLTAAKL | LQDAGH---- |
| Flounder_LAO2                               | KNGLPAL--- | -----       | --LP TAKTCL  | PPRHVVIVGA | GMAGLTAASL | LEGVGF---- |
| Flounder_LAO1                               | ENGLP----- | -----       | ---PIHT----- | PPRHVVVVGA | GMAGLTAAKL | LQDAGH---- |
| Rockfish_LAO                                | EFGLP----- | -----       | ---NINT----- | -SHHVVIAGA | GMAGLTAAKL | LKEAGH---- |
| Green_pufferfish_LAO                        | QTGLP----- | -----       | ---PVNR----- | -SHHVVIAGA | GLAGLTAAKL | LQDAGH---- |
| Zebrafish_LAO                               | EQGLP----- | -----       | ---PTKT----- | -PKHVLIVGA | GAAGLTAAKF | LEDAGH---- |
| Panda_IL4I1                                 | TLGLN----- | -----       | ---RTSK----- | -PQRVIVVGA | GAAGLVAAKV | LSDAGH---- |
| Dog_IL4I1                                   | TLGLN----- | -----       | ---RTSK----- | -PQRVIVVGA | GAAGLVAAKV | LSDAGH---- |
| Human_IL4I1                                 | TWGLN----- | -----       | ---RTLK----- | -PQRVIVVGA | GVAGLVAAKV | LSDAGH---- |
| Mouse_IL4I1                                 | TLGLN----- | -----       | ---RTSK----- | -PQKVVVVGA | GVAGLVAAKM | LSDAGH---- |
| Streptosporangium_roseum_{Actinobacteria}   | QEGLP----- | -----       | --ARQDT----- | -PKRVLVIGA | GMAGLVAAYE | LMRQGH---- |
| Roseiflexus_castenholzii_{Chloroflexi}      | VAGPP----- | -----       | --HR-----    | -PKRVVIVGA | GVAGLVAGYE | LLRAGH---- |
| Bacillus_cereus_{Firmicutes}                | -----      | -----       | ---KTIS---   | -PKQIIVVGA | GMAGLVSASL | LKAAGH---- |
| Marseillevirus                              | -----      | -----       | ---MYDFIVAGG | GISGVFFAWR | MNTFFP--   | NK         |
|                                             |            |             |              |            |            |            |
| Aplysia_punctata_cyplasin_L_{Mollusks}      | NIGVFEFC-D | RVGGRLFITYQ | LPNTP-----   | --DVQLELGG | MRYITG---- | -----AHN   |
| Aplysia_punctata_cyplasin_S_{Mollusks}      | NIGVFEFC-D | RVGGRLFITYQ | LPNTP-----   | --DVQLELGG | MRYITG---- | -----AHN   |
| Aplysia_californica_aplysianin_A_{Mollusks} | DVGVFEYS-D | RVGGRLYTYQ  | LPNTP-----   | --DVNLEIGG | MRYITG---- | -----AHN   |
| Aplysia_punctata_ink_toxin_1_{Mollusks}     | DIAVFEYS-D | RVGGRLFITYQ | LPNTP-----   | --DVNLEIGG | MRFIEG---- | -----AMH   |
| Aplysia_punctata_ink_toxin_2_{Mollusks}     | DIAVFEYS-D | RVGGRLFITYQ | LPNTP-----   | --DVNLEIGG | MRFIEG---- | -----AMH   |
| Aplysia_punctata_ink_toxin_3_{Mollusks}     | DIAVFEYS-D | RVGGRLFITYQ | LPNTP-----   | --DVNLEIGG | MRFIEG---- | -----AMH   |
| Aplysia_californica_escapin_{Mollusks}      | DIAVFEYS-D | RVGGRLYTYQ  | LPNTP-----   | --DVNLEIGG | MRFIEG---- | -----AMH   |
| Achatina_fulica_achacin_{Mollusks}          | TVELFEYS-N | RIGGRLFTH   | LPNVP-----   | --DLNLESGG | MRYFKN---- | -----HHK   |
| Hahella_chejuensis_{Proteobacteria}         | DIALFEYS-D | RIGGRLYSIT  | LPGLP-----   | --NVVAEVEG | MRYIP----- | -----DA    |
| Pseudomonas_entomophila_{Proteobacteria}    | RIQLFEYG-D | RIGGRSFSIN  | LPGLP-----   | --NVVAEVEG | MRYMPG---- | -----ADG   |
| Burkholderia_ubonensis_{Proteobacteria}     | KIVVFEYS-D | RIGGRLLSVR  | PPGID-----   | --NMVAELGG | MRILPE---- | -----VQP   |
| Chromobacterium_violaceum_{Proteobacteria}  | KIAVFEAS-N | HIGGRLLSVR  | PPDIF-----   | --DMVAELGG | MRILPA---- | -----VQP   |

|                                             |            |            |            |            |            |            |
|---------------------------------------------|------------|------------|------------|------------|------------|------------|
| Chitinophaga_pinensis_{Bacteroidetes}       | KIVVFEGS-D | HIGGRLLSVK | PPEIP----- | --YMTAELGG | MRILEN---- | -----TQK   |
| Flavobacterium_johnsoniae_{Bacteroidetes}   | QVQIFDLS-S | KLGRRLSEVI | MPGM-----  | --DFWGELGG | MRYLTS---- | -----QEI   |
| Dyadobacter_fermentans_{Bacteroidetes}      | QVQIFDMS-E | RLGRRLSEVV | LPGM-----  | --NFWGELGG | MRYLTS---- | -----QEI   |
| Staphylococcus_aureus_{Firmicutes}          | KIGIYDLS-D | KIGGRLESTL | LPES-----  | --NVSGELGG | MRYLTS---- | -----QKI   |
| Clostridium_botulinum_{Firmicutes}          | NVTLFEAS-H | RIGGRVYTY  | FDRNR----- | --NYYGELGP | MSIP-----  | -----VSHY  |
| Clostridium_carboxidivorans_{Firmicutes}    | DITVFDALKD | RVGGRVYTY  | FDEDK----- | --KFYGELGP | IRIP-----  | -----VAHE  |
| Turkey_LAO                                  | KVTILETS-N | RVGGRIRTYR | E---K----- | --DWYVELGA | MRLP-----  | -----SKHR  |
| Chicken_LAO                                 | KVTILEIS-N | RVGGRIRTYR | E---K----- | --DWYVELGA | MRLP-----  | -----SKHR  |
| Zebrafinch_LAO                              | EVILERS-S  | WVGGRIRTYR | P-EGQ----- | --DWYVELGP | MRLP-----  | -----GKHR  |
| Ophiophagus_hannah_{Elapidae}               | EVVILEAS-D | RVGGRVTKYR | E---D----- | --GWYVDVGP | MRVP-----  | -----QTHR  |
| Crotalus_atrox_{Viperidae}                  | QVTVLEAS-E | RVGGRVRTYR | ---KK----- | --DWYANLGP | MRLP-----  | -----TKHR  |
| Sistrurus_catenatus_{Viperidae}             | QVTVLEAS-E | RVGGRVRTYR | ---KE----- | --DWYANLGP | MRLP-----  | -----TKHR  |
| Gloydeus_halys_{Viperidae}                  | QVTVLEAS-E | RAGGRVRTYR | N-DKE----- | --DWYANLGP | MRLP-----  | -----EKHR  |
| Trimesurus_stejnegeri_{Viperidae}           | EVTVLEAS-E | RAGGRVRTYR | N-DEE----- | --GWYANLGP | MRLP-----  | -----EKHR  |
| Bothrops_jararacussu_{Viperidae}            | QVTVLEAS-E | RAGGQVKTYR | N-EKE----- | --GWYANLGP | MRLP-----  | -----EKHR  |
| Echis_ocellatus_{Viperidae}                 | KVTVLEAS-Q | LVGGRVTKYR | N-AKE----- | --GWYANLGP | MRIP-----  | -----EKHR  |
| Oxyuranus_scutellatus_{Elapidae}            | KVTVLEAS-E | RVGGRVHTYR | N-EKE----- | --GWYVNLGP | MRLP-----  | -----ERHR  |
| Pseudechis_australis_{Elapidae}             | KVTVLEAS-E | RVGGRVNTYR | N-EKD----- | --GWYVNLGP | MRLP-----  | -----ERHR  |
| Bungarus_multicinctus_{Elapidae}            | RVTVLEAS-D | RVGGRANTYR | D-EKE----- | --GWYVNMGP | MRLP-----  | -----ERHR  |
| Demancia_vestigiata_{Elapidae}              | NVMLEAS-E  | RVGGRVNTYR | N-EQE----- | --GWYVNLGP | MRLP-----  | -----ERHR  |
| Dog_LAO1                                    | QVTILEAS-N | HVGGRVVTFR | N-EKE----- | --GWYHELGP | MRIP-----  | -----KSHR  |
| Panda_LAO1                                  | QVTILETS-Q | HIGGRVATIR | N-EEE----- | --GWYHELGP | MRIP-----  | -----KSHR  |
| Bovine_LAO1                                 | QVTILEAS-N | HVGGRVMTFR | N-EKE----- | --GWYELGP  | MRIP-----  | -----KSHR  |
| Horse_LAO1                                  | QVTILEAS-D | HVGGRVLTFR | N-EEE----- | --GWYFELGP | MRIP-----  | -----KSHR  |
| Mouse_LAO1                                  | EVTILEAS-N | HIGGRVVTLR | N-KEE----- | --GWYLELGP | MRIP-----  | -----ESHK  |
| Opossum_LAO1                                | RVTVLETR-D | KIGGRVATFR | S-PDR----- | --NWYIELGP | MRLP-----  | -----ATHR  |
| Horse_LAO2                                  | QVTVLEAS-G | RVGGRIETHR | V-PGA----- | --QWYVELGA | MRIP-----  | -----AHRH  |
| Opossum_LAO2                                | QVTVLEAS-G | RVGGRIETHR | V-PGA----- | --KWYVELGA | MRIP-----  | -----ANHM  |
| Flounder_LAO3                               | KVTILEAS-D | RVGGRVETYR | N-END----- | --GWYIEFGA | MRIP-----  | -----TTHE  |
| Flounder_LAO2                               | KVTILEAS-D | RVGGRVETYR | N-END----- | --GWYIEFGA | MRIP-----  | -----YTHE  |
| Flounder_LAO1                               | KVTILEAS-G | RVGGRVETYR | N-EQ-----  | --GWYVELGA | MRIP-----  | -----STHK  |
| Rockfish_LAO                                | KVTILEAS-S | RVGGRVETYR | N-EKE----- | --GWYVELGA | MRIP-----  | -----SSHQ  |
| Green_pufferfish_LAO                        | QVTILEAS-G | RVGGRVETYR | N-QQE----- | --GWYADLGA | MRIP-----  | -----SSHQ  |
| Zebrafish_LAO                               | KVTILEAS-D | RIGGRVATFR | N-GRE----- | --GWYVELGA | MRIP-----  | -----SFHR  |
| Panda_IL4I1                                 | KVTILEAD-N | RIGGRILTFR | D-RKT----- | --GWYVELGA | MRMP-----  | -----SSHR  |
| Dog_IL4I1                                   | KVTILEAD-N | RIGGRILTFR | D-RKT----- | --GWYVELGA | MRMP-----  | -----NSHR  |
| Human_IL4I1                                 | KVTILEAD-N | RIGGRIFTFR | D-QNT----- | --GWYVELGA | MRMP-----  | -----SSHR  |
| Mouse_IL4I1                                 | KVTILEAD-N | RIGGRIFTFR | D-EKT----- | --GWYVELGA | MRMP-----  | -----SSHR  |
| Streptosporangium_roseum_{Actinobacteria}   | DPVVLEAQ-Q | RVGGRVHTLR | G-FAE----- | --GLYAEAGA | MRIP-----  | -----RVHD  |
| Roseiflexus_castenholzii_{Chloroflexi}      | DPLILEAR-N | RVGGRICTLR | EPFTE----- | --GLYGEAGA | MRIP-----  | -----RAHT  |
| Bacillus_cereus_{Firmicutes}                | DVKIFEAN-N | RVGGRIETVR | M-EDT----- | --GLYLDVGA | MRIP-----  | -----YTHR  |
| Marseillevirus                              | KILLIEKE-E | RLGGRLLSYD | LGN-----   | --GIYAEQGG | QRTFP----- | -----DIDK  |
|                                             |            |            |            |            |            |            |
| Aplysia_punctata_cyplasin_L_{Mollusks}      | LLEGVVRQLG | LTPVV----- | -----FT    | EGFGKLGTR  | YYLRGQSLTF | QEVLTGDVP- |
| Aplysia_punctata_cyplasin_S_{Mollusks}      | LLEGVVRQLG | LTPVV----- | -----FT    | EGFGKLGTR  | YYPRGQSLTF | QEALTGDVP- |
| Aplysia_californica_aplysianin_A_{Mollusks} | ILQALTKELG | LESVP----- | -----FT    | EGFGRPGRTR | FFLRGQSLTY | DEVKFGDVP- |
| Aplysia_punctata_ink_toxin_1_{Mollusks}     | RLWRVISELG | LTPKV----- | -----FK    | EGFGKEGRQR | FYLRGQSLTK | KQVKSGDVP- |

|                                            |            |            |            |             |            |            |
|--------------------------------------------|------------|------------|------------|-------------|------------|------------|
| Aplysia_punctata_ink_toxin_2_{Mollusks}    | RLWRVISELG | LTPKV----- | -----FK    | EGFGKEGRQR  | FYLRGQSLTK | KQVKSGDVP- |
| Aplysia_punctata_ink_toxin_3_{Mollusks}    | RLWRVISELG | LTPKV----- | -----FK    | EGFGKEGRQR  | FYLRGQSLTK | KQVKSGDVP- |
| Aplysia_californica_escapin_{Mollusks}     | RLWKVISELG | LTPKV----- | -----FK    | EGFGKEGRQR  | FYLRGQSLTK | KQVKSGDVP- |
| Achatina_fulica_achacin_{Mollusks}         | IFGVLVKELN | LSNKE----- | -----FT    | EGFGKPGRTR  | FFARGKSLTL | EEMTSGDVP- |
| Hahella_chejuensis_{Proteobacteria}        | HILVANLVKY | LQLPTK---- | --DFPMG-AP | EPVGSK-DNL  | FFLRGARFRY | RDFSHPDK-  |
| Pseudomonas_entomophila_{Proteobacteria}   | HVMVDTLVQH | LGLPSK---- | --DFPMGNEQ | DQIGAK-DNL  | FYLRGQRFRF | RDFVEAPHK- |
| Burkholderia_ubonensis_{Proteobacteria}    | LIKKLIDTLN | PILPP----- | --SQQIDLYK | FPVDEP-VNL  | AYLRGVHLRL | SDFTQEPAK- |
| Chromobacterium_violaceum_{Proteobacteria} | LVTQLIHELN | KELPD----- | --DEQITLYD | FPVDEP-QNI  | AFLRGVYLRL | ADFTQNPDL- |
| Chitinophaga_pinensis_{Bacteroidetes}      | LIVDLIETLN | TELPA----- | --AEKITLYD | FPVDEP-QNL  | AYLRGEYLRL | VDFATRPDK- |
| Flavobacterium_johnsoniae_{Bacteroidetes}  | VTTLIEGY-I | SPKDPKKRIP | VLKDKMTPVP | FPMGKSSKLL  | MYLRKERFKQ | DAWDEAQKKG |
| Dyadobacter_fermentans_{Bacteroidetes}     | VTTLIEGYPL | TEKDKAKRKF | VLNDRMTPIP | FPMGNAADLL  | FYLRKEHFKQ | DAWNVAQQNG |
| Staphylococcus_aureus_{Firmicutes}         | TTTLIENIFN | LNNER----- | -----      | FELGNPSHHT  | FYLRGQRFKE | DAWESYQKDN |
| Clostridium_botulinum_{Firmicutes}         | TTWHYINLFG | -----      | -----LH    | TSPFVNNDN   | NLFYIRDERA | INDAKGKSVE |
| Clostridium_carboxidivorans_{Firmicutes}   | TTWHYINLFG | -----      | -----LA    | TQPFIQNNPN  | NFVYVQETRA | RRDP--KSIE |
| Turkey_LAO                                 | LVREFIRQFD | -----      | -----LK    | LNPFFHQTDN  | AWYFVNGIRA | ---RVAEVNR |
| Chicken_LAO                                | LVREFIRQFD | -----      | -----LK    | LNPFRQTDN   | AWYFVNGIRA | ---RVAEVNR |
| Zebrafinch_LAO                             | LVREFIRQFK | -----      | -----LK    | LNPFIQRDEN  | SWFFLRGVRV | ---RAGEVER |
| Ophiophagus_hannah_{Elapidae}              | IVREYIKKFN | -----      | -----IS    | LNPFRQTDEN  | AWYLKHKVRQ | ---KMSAN-- |
| Crotalus_atrox_{Viperidae}                 | IVREYIKKFD | -----      | -----LK    | LNEFSQENEN  | AWYFIKNIRK | ---RVREVKN |
| Sistrurus_catenatus_{Viperidae}            | IVREYIKKFG | -----      | -----LE    | LNEFFQENDN  | AWYFIKNIRK | ---RVGEVKN |
| Gloydeus_halys_{Viperidae}                 | IVREYIRKFG | -----      | -----LQ    | LNEFSQENDN  | AWYFIKNIRK | ---RVGEVKK |
| Trimesurus_stejnegeri_{Viperidae}          | IVREYIRKFN | -----      | -----LQ    | LNEFSQENDN  | AWHFVKNIRK | ---TVGEVKK |
| Bothrops_jararacussu_{Viperidae}           | IVREYIRKFG | -----      | -----LQ    | LNEFSQENEN  | AWYFIKNIRK | ---RVGEVKN |
| Echis_ocellatus_{Viperidae}                | IVREYIRKFG | -----      | -----LE    | LNEFVQETDN  | GWYFVKNIRK | ---RVGEVKK |
| Oxyuranus_scutellatus_{Elapidae}           | IIREYIRKFG | -----      | -----LK    | LNEFFQENEN  | AWYFIRNIRK | ---RVWEVKK |
| Pseudechis_australis_{Elapidae}            | IIREYIRKFG | -----      | -----LE    | LNEFIQENDN  | AWYFIKNIRK | ---RVSEVKK |
| Bungarus_multicinctus_{Elapidae}           | IVRTYIAKFG | -----      | -----LK    | LNEFFQENEN  | AWYFIRNIRK | ---RVWEVKK |
| Demancia_vestigiata_{Elapidae}             | IVREYIKKFG | -----      | -----LQ    | LNQFFQEDD   | AWYFIKNIRK | ---KVREVKE |
| Dog_LAO1                                   | LVHTYVKKLG | -----      | -----LK    | LNKFIQYDDN  | TWHLINGQRY | ---RTREVKD |
| Panda_LAO1                                 | LVHTYIKKLG | -----      | -----LK    | LNRFIQYDGN  | TWYLINGKRH | ---RSKEVQD |
| Bovine_LAO1                                | LVHTYVRKLG | -----      | -----LK    | LNKFLQYHDN  | TWFLINRKRY | ---RAGEVKA |
| Horse_LAO1                                 | LVHTYVKKLG | -----      | -----LK    | LNKFIQYDDN  | TWYLINGQRY | ---RTREVKA |
| Mouse_LAO1                                 | LIHTYVQKLG | -----      | -----LK    | LNKFKHQYDSN | TWYLLNGQRY | ---RASEVMA |
| Opossum_LAO1                               | LVRHYVKKMG | -----      | -----LK    | MNTFIQASKN  | TWYINGRRH  | ---RTSDVLA |
| Horse_LAO2                                 | LSRELIRKYG | -----      | -----LK    | LNEFYPSNNQ  | TWVLVNGVRR | ---RMGEVQA |
| Opossum_LAO2                               | FSRELISQFG | -----      | -----LK    | LNEFSRYDDR  | TWVLVNGVRR | ---RTGEVQA |
| Flounder_LAO3                              | IIRWYVESLG | -----      | -----LE    | LNEFFMTHPK  | TFYLVNGIKK | ---RTFEVNA |
| Flounder_LAO2                              | IIRWYVESLG | -----      | -----LK    | LNEFIMTDPK  | TFYLVNGIKK | ---RTFEVKA |
| Flounder_LAO1                              | IVLFFVELLK | -----      | -----LK    | LNEFIMTDPN  | TFYLVNGIKK | ---RTFEVNA |
| Rockfish_LAO                               | IVRWYAKELG | -----      | -----VK    | LNEFIMDDPN  | TFYLVNGVLE | ---KTETVQK |
| Green_pufferfish_LAO                       | IVHAFVKMLG | -----      | -----LK    | LNRFMQVDPN  | TFYLVNGVRR | ---RWSAVQH |
| Zebrafish_LAO                              | ILLAVAQKLS | -----      | -----LK    | LGKFFVQDDPN | TYYYINGERH | ---KTYTVKQ |
| Panda_IL4I1                                | ILHELCKSLG | -----      | -----LN    | LTKFTQYDEN  | TWIEVNNLKL | ---RNYVVEK |
| Dog_IL4I1                                  | ILHELCKSLG | -----      | -----LN    | LTKFTQYDEN  | TWIEVNNLKL | ---RNYVVEK |
| Human_IL4I1                                | ILHKLQGLG  | -----      | -----LN    | LTKFTQYDKN  | TWTEVHEVKL | ---RNYVVEK |
| Mouse_IL4I1                                | ILHKLCRTLG | -----      | -----LN    | LTQFTQYDEN  | TWTEVHNVKL | ---RNYVVEK |
| Streptosporangium_roseum_{Actinobacteria}  | LTLAYCREFG | -----      | -----LG    | LRPFVMGNPR  | TLAFIQGRRM | ---TMEDLNA |

|                                             |             |            |            |            |            |            |
|---------------------------------------------|-------------|------------|------------|------------|------------|------------|
| Roseiflexus_castenholzii_{Chloroflexi}      | LTMAYIERFG  | -----      | -----LP    | TVDFIMDSMQ | TYVHIGGVKR | ---RRAEAHA |
| Bacillus_cereus_{Firmicutes}                | LTMAYIRKFG  | -----      | -----LQ    | VSPFINRNET | DIIYVNGRKT | ---TLKQYEK |
| Marseillevirus                              | ELTRVLQMIG  | -----      | -----KK    | SFPMPYNBPQ | NVAELKGRF  | TVSIGNATGA |
|                                             |             |            |            |            |            |            |
| Aplysia_punctata_cyplasin_L_{Mollusks}      | -----YNL    | TVAEKQNQDN | IFAFYLKELT | R-----     | -----      | -----F     |
| Aplysia_punctata_cyplasin_S_{Mollusks}      | -----YNL    | TVAEKQNQDN | IFAFYLKELT | R-----     | -----      | -----F     |
| Aplysia_californica_aplysianin_A_{Mollusks} | -----YNL    | TTVEKRNQGR | IYEYLLKELT | G-----     | -----      | -----F     |
| Aplysia_punctata_ink_toxin_1_{Mollusks}     | -----YDL    | SPEEKENQGN | LVEYYLEKLT | G-----     | -----      | -----L     |
| Aplysia_punctata_ink_toxin_2_{Mollusks}     | -----YDL    | SPEEKENQGN | LVEYYLEKLT | G-----     | -----      | -----L     |
| Aplysia_punctata_ink_toxin_3_{Mollusks}     | -----YDL    | SPEEKENQGN | LVEYYLEKLT | G-----     | -----      | -----L     |
| Aplysia_californica_escapin_{Mollusks}      | -----YDL    | SPEEKANQGR | LVEYYLEKLT | G-----     | -----      | -----L     |
| Achatina_fulica_achacin_{Mollusks}          | -----YNL    | STEEKANQAN | LAGYLLKCLT | G-----     | -----      | -----F     |
| Hahella_chejuensis_{Proteobacteria}         | ----IPYNMV  | WSERGYGPEP | LQVKIMNLYL | PG-----    | -----      | -----FA    |
| Pseudomonas_entomophila_{Proteobacteria}    | ----IPYDLG  | WTERGYNPED | LQVNVMNISY | PG-----    | -----      | -----FD    |
| Burkholderia_ubonensis_{Proteobacteria}     | ----VPYQLS  | FLDRGETAGA | IIINAIEQIV | PG-----    | -----      | -----IT    |
| Chromobacterium_violaceum_{Proteobacteria}  | ----VPYQLN  | FIDHGQSAGA | VIVNAIEQIV | PG-----    | -----      | -----IT    |
| Chitinophaga_pinensis_{Bacteroidetes}       | ----VPYNMS  | FLEEGNGPPT | IIVNAIEQIV | PG-----    | -----      | -----IT    |
| Flavobacterium_johnsoniae_{Bacteroidetes}   | KKLPTRYLNL  | ETDLGFSSDQ | LFNKIIYDVL | MADPWVAKKY | QKKIKKGHNV | YDYTFELTSE |
| Dyadobacter_fermentans_{Bacteroidetes}      | EKLVTTRYLN  | DDDIGFSSDQ | LFNKIIYDVL | MADPWVVENF | SDRVKKGPT  | YDYAFMLTSE |
| Staphylococcus_aureus_{Firmicutes}          | SKFQTRYFMH  | QSYQGYHPDQ | LFNKVIADVC | LNDRWFTDTY | GERITIKDN- | YNITFKLTKK |
| Clostridium_botulinum_{Firmicutes}          | NNIYPKFNLS  | EIERKKAWHE | LHEKIYEKYL | KS-----    | -----      | -----      |
| Clostridium_carboxidivorans_{Firmicutes}    | KKIYPKYNLR  | QIEKNTTWPK | LYEYAVHFFM | NK-----    | -----      | -----      |
| Turkey_LAO                                  | NPDILNYTLR  | ASERKGSASQ | LYREALQSAF | KE-----    | -----      | -----      |
| Chicken_LAO                                 | NPDILNYTLR  | PSEKGSASQ  | LYREALQSAV | KE-----    | -----      | -----      |
| Zebrafinch_LAO                              | NPDLNLYTVK  | PSEKGNVQ   | LYREVLNKAL | KK-----    | -----      | -----      |
| Ophiophagus_hannah_{Elapidae}               | NPENFGYQLN  | PNERGKSASQ | LFDETLDK-- | -----      | -----      | -----      |
| Crotalus_atrox_{Viperidae}                  | NPGLLEYPVK  | PSEEGKSAQ  | LYVESLRKVV | KE-----    | -----      | -----      |
| Sistrurus_catenatus_{Viperidae}             | NPGLLKYPVK  | PSETGKSAGQ | LYEESLRKVV | EE-----    | -----      | -----      |
| Gloydeus_halys_{Viperidae}                  | DPGVLYKYPVK | PSEEGKSAQ  | LYEESLGKVV | EE-----    | -----      | -----      |
| Trimesurus_stejnegeri_{Viperidae}           | DPGVLYKYPVK | PSEEGKSAEQ | LYEESLREVE | KE-----    | -----      | -----      |
| Bothrops_jararacussu_{Viperidae}            | DPGVLDYPVK  | PSEVGKSAGQ | LYEESLQKAV | EE-----    | -----      | -----      |
| Echis_ocellatus_{Viperidae}                 | DPGLLKYPVK  | PSEAGKSAGQ | LYQEALGKAV | EE-----    | -----      | -----      |
| Oxyuranus_scutellatus_{Elapidae}            | DPGVFKYPVK  | PSEEGKSAQ  | LYRESLKKVI | EE-----    | -----      | -----      |
| Pseudechis_australis_{Elapidae}             | DPGVFKYPVK  | PSEEGKSAQ  | LYRESLQKVI | EE-----    | -----      | -----      |
| Bungarus_multicinctus_{Elapidae}            | DPGVFKYPVK  | PSEEGKSAQ  | LYRESLKKII | EE-----    | -----      | -----      |
| Demancia_vestigiata_{Elapidae}              | NPSIFYPYVK  | PSEKGSAPQ  | LYRDSLQKII | EE-----    | -----      | -----      |
| Dog_LAO1                                    | NPEVLGYSVD  | PVEKGGPTN  | LFYQSIKVK  | QN-----    | -----      | -----      |
| Panda_LAO1                                  | NPEVLGYSVS  | PTEKAKSPSN | LFYQSIKVP  | PA-----    | -----      | -----      |
| Bovine_LAO1                                 | NPELLGYSMN  | PREKGNAIN  | LFYQSIGKVT | PH-----    | -----      | -----      |
| Horse_LAO1                                  | NPELLGYSVN  | PTEKGSAAK  | LFYQSIKVP  | P-----     | -----      | -----      |
| Mouse_LAO1                                  | NPGILGYPLR  | PSEKNTVTD  | LFYQAITKIK | PH-----    | -----      | -----      |
| Opossum_LAO1                                | NPNILGYSVS  | PKESGMPSE  | LFQEAIKIV  | DE-----    | -----      | -----      |
| Horse_LAO2                                  | DPRLGYPVR   | ADEERKTAEQ | LFEDSLRKIM | EE-----    | -----      | -----      |
| Opossum_LAO2                                | NPGLLGYPVR  | SDEKGTADQ  | LFDESRLKVV | EE-----    | -----      | -----      |
| Flounder_LAO3                               | DPDNMGYNLE  | GHEKGSADQ  | LLQQSLEKVN | EY-----    | -----      | -----      |
| Flounder_LAO2                               | HPDSLGYNLE  | GHEKGSANE  | LLQQALEKVN | DY-----    | -----      | -----      |
| Flounder_LAO1                               | HPDILGYNLE  | GNEKGSADQ  | LLQQALKKVN | VY-----    | -----      | -----      |



|                                             |               |             |            |            |            |            |
|---------------------------------------------|---------------|-------------|------------|------------|------------|------------|
| Rockfish_LAO                                | DPDVLKYHVE    | ASEKGKSADE  | LLQHALQKVQ | DE-----    | -----      | -----      |
| Green_pufferfish_LAO                        | DPDVLQYQVW    | RNESGRSAGE  | LKNQALQAIK | DY-----    | -----      | -----      |
| Zebrafish_LAO                               | NPDLVNYPVY    | NQERGNASE   | LFNIALSKLQ | DD-----    | -----      | -----      |
| Panda_IL4I1                                 | MPEKLGYPRLD   | PREKGHSPPEE | IYQMAFNPAL | KD-----    | -----      | -----      |
| Dog_IL4I1                                   | MPEKLGYKLS    | PREKGHSPPEE | IYQMALNQAL | KD-----    | -----      | -----      |
| Human_IL4I1                                 | VPEKLGALR     | PQEKGHSPED  | IYQMALNQAL | KD-----    | -----      | -----      |
| Mouse_IL4I1                                 | MPEKLGYNLN    | NREGRHSPED  | IYQMALNKAF | KD-----    | -----      | -----      |
| Streptosporangium_roseum_{Actinobacteria}   | DPGLVDFELA    | EHERGRSYEE  | LWNAATAEVR | ER-----    | -----      | -----      |
| Roseiflexus_castenholzii_{Chloroflexi}      | DPDALGFETT    | AAEKGRLAGD  | VWADTIRPLV | EQ-----    | -----      | -----      |
| Bacillus_cereus_{Firmicutes}                | DPSILRYPVE    | MNEVGKTSEE  | LLLLAVQPII | NF-----    | -----      | -----      |
| Marseillevirus                              | KKQELEQLYN    | TGTTKSVNGS  | VSDAEIKLAP | EILG-----  | -----      | -----      |
|                                             |               |             |            |            |            |            |
| Aplysia_punctata_cyplasin_L_{Mollusks}      | DVGDFVFTRE    | QLLKLRSVDG  | RLLYQLTFDE | ALD-----   | --LVASPEGK | EFARDIHFVT |
| Aplysia_punctata_cyplasin_S_{Mollusks}      | DVGDFVFTRE    | QLLKLRSVDG  | RPLYQLTFDE | ALD-----   | --LVASPEGK | EFARDIHFVT |
| Aplysia_californica_aplysianin_A_{Mollusks} | DIGNGSISRE    | QLLKLRSVDG  | RPLYQLTFDE | ALD-----   | --LVASSEGK | EFARDVHVFT |
| Aplysia_punctata_ink_toxin_1_{Mollusks}     | QLNGEPLKRE    | VALKLTVPDG  | RFLYDLSFDE | AMD-----   | --LVASPEGK | EFTRDTHVFT |
| Aplysia_punctata_ink_toxin_2_{Mollusks}     | QLNGEPLKRE    | VALKLTVPDG  | RFLYDLSFDE | AMD-----   | --LVASPEGK | EFTRDTHVFT |
| Aplysia_punctata_ink_toxin_3_{Mollusks}     | KLNGGPLKRE    | VALKLTVPDG  | RFLYDLSFDE | AMD-----   | --LVASPEGK | EFTRDTHVFT |
| Aplysia_californica_escapin_{Mollusks}      | QLNGGPLKRE    | VALKLTVPDG  | RFLYDLTFDE | ALD-----   | --LVASPEGK | EFARDTHVFT |
| Achatina_fulica_achacin_{Mollusks}          | DG--EVLTIPTIP | QANKLEVDG   | RKLYQLTVDE | ALD-----   | --KVGTPEGK | EFLKAFSTGN |
| Hahella_chejuensis_{Proteobacteria}         | DLSLCDQMR-    | -----VKVFG  | KEIWKYGFWD | LLY-----   | --RVLSNEGY | MFMDAGGYD  |
| Pseudomonas_entomophila_{Proteobacteria}    | KLSLAEQMQ-    | -----VQVFG  | KPIWRYGFWD | LLY-----   | --RVLSNEGY | QFMKDAGGYD |
| Burkholderia_ubonensis_{Proteobacteria}     | DAGLTEDQRR    | QMAQQASFGG  | VPLYKQGFWN | VLL-----   | --RVIDGEAY | QLGVDAGGYN |
| Chromobacterium_violaceum_{Proteobacteria}  | NPALTEEQR     | EMAQSAEFGG  | VPLYKQGFWN | VLL-----   | --RVITGEAY | QYAEVGGYD  |
| Chitinophaga_pinensis_{Bacteroidetes}       | NPDLTEDERR    | EMAKVASFDG  | LPLYHWGFWN | LLY-----   | --RVISSEGY | QFAMDAGGYD |
| Flavobacterium_johnsoniae_{Bacteroidetes}   | DWDEIKPRLV    | YNFPKSPYDK  | RKVNDLGFWN | LIK-----   | --DQVSQEGY | EFLANAGGY  |
| Dyadobacter_fermentans_{Bacteroidetes}      | DWDKVKPHLR    | YHPPGSPYDG  | RKVNDLGFWN | LIK-----   | --DQVSQEGY | LFVANAGGY  |
| Staphylococcus_aureus_{Firmicutes}          | EWDDIKLNLV    | YKKEGSPYDG  | LPISRIGFWN | LLK-----   | --DMLGNEGY | AFLADAGGY  |
| Clostridium_botulinum_{Firmicutes}          | ---LSTELRK    | ELIQ-VKSEY  | SKSITEIDKL | SYRNAY---- | ENVDLSDAI  | SMLGYLEGKE |
| Clostridium_carboxidivorans_{Firmicutes}    | ---LRPEIRA    | EILK-ILPKY  | NPSYNTLLNI | SIRQNF---- | EMLGLSPDAI | DMIASVDAFT |
| Turkey_LAO                                  | ---FQTMNCK    | E----YLAK   | HDSFSTKEYL | IKVG-----  | ---NLSRGAV | QMIGDLLNED |
| Chicken_LAO                                 | ---FQTMNCK    | E----YLAK   | HDSFSTKEYL | IKVG-----  | ---NLSRGAV | QMIGDLLNED |
| Zebrafinch_LAO                              | ---FQSTDC     | K----FLAE   | HDSYSTKEYL | IKVG-----  | ---ELSRGAV | DMIGDVLNED |
| Ophiophagus_hannah_{Elapidae}               | ---VTDDCT     | L-----QKKEK | YDSFSTKEYL | IKEG-----  | ---KLSTGAV | EMIGDFLNEE |
| Crotalus_atrox_{Viperidae}                  | ---LKRTNCK    | Y-----ILDK  | YDTYSTKEYL | LKEG-----  | ---NLSPGAV | DMIGDLLNED |
| Sistrurus_catenatus_{Viperidae}             | ---LRSTNCK    | Y-----ILDK  | YDTYSTKEYL | LKEG-----  | ---NLSPGAV | DMIGDLLNED |
| Gloydeus_halys_{Viperidae}                  | ---LKRTNCS    | Y-----ILNK  | YDTYSTKEYL | LKEG-----  | ---NLSPGAV | DMIGDLMNED |
| Trimesurus_stejnegeri_{Viperidae}           | ---LKRTNCS    | Y-----ILNK  | YDTYSTKEYL | LKEG-----  | ---NLSPGAV | DMIGDLMNED |
| Bothrops_jararacussu_{Viperidae}            | ---LRRTNCS    | Y-----MLNK  | YDTYSTKEYL | LKEG-----  | ---NLSPGAV | DMIGDLLNED |
| Echis_ocellatus_{Viperidae}                 | ---LKRTNCS    | Y-----MLNK  | YDTYSTKEYL | IKEG-----  | ---NLSTGAV | DMIGDLMNED |
| Oxyuranus_scutellatus_{Elapidae}            | ---LKRTNCS    | Y-----ILNK  | YDTYSTKEYL | IKEG-----  | ---NLSRGAV | DMIGDLLNED |
| Pseudechis_australis_{Elapidae}             | ---LKRTNCS    | Y-----ILNK  | YDTYSTKEYL | IKEG-----  | ---NLSPGAV | DMIGDLLNED |
| Bungarus_multicinctus_{Elapidae}            | ---LKRTNCS    | Y-----ILDK  | YDSYSTKEYL | IKEG-----  | ---NLSRGAV | DMIGDLLNED |
| Demancia_vestigiata_{Elapidae}              | ---YGRSNCS    | Y-----ILNK  | YDTYSTKDYL | IKEG-----  | ---NLSPGAV | DMIGDLLNEG |
| Dog_LAO1                                    | ---LKNFNCS    | R-----LISF  | YDSYSTKAYL | LKEG-----  | ---ALSEGAV | KMIGTLMNED |
| Panda_LAO1                                  | ---SPLPGSG    | KKKFWPKVTW  | QVRGQTQAYL | VKEG-----  | ---ELSEGAV | KMIGTVMNED |
| Bovine_LAO1                                 | ---LKELNCS    | H-----LMSF  | YDSYSTKAYL | LKEG-----  | ---MLSQRGV | KMIRDVMNED |

|                                             |             |            |            |            |            |             |
|---------------------------------------------|-------------|------------|------------|------------|------------|-------------|
| Horse_LAO1                                  | -----       | -----      | -----ASP   | LPG-----   | -----      | -----       |
| Mouse_LAO1                                  | ---RKTSNCS  | Q----      | LLSL       | YDSYSTKAYL | MKEG-----  | ---TLSKGAI  |
| Opossum_LAO1                                | ---LQHTNCS  | Y-----     | ILSK       | YDTFSTKAYL | IKEG-----  | ---KLSKGAV  |
| Horse_LAO2                                  | ---LKTSSCS  | Q-----     | VLEK       | YDSFSTKEYL | IKVG-----  | ---NLSLGA   |
| Opossum_LAO2                                | ---LKMSNCG  | Q-----     | ILEK       | YDSFSTKEYL | IKVG-----  | ---NLSRGAV  |
| Flounder_LAO3                               | ---IAKHGCC  | E-----     | ALKK       | YDHYTVKDYL | KTEG-----  | ---NLSAETV  |
| Flounder_LAO2                               | ---VATHGCS  | E-----     | ALKK       | YDHYSVKRYL | KKEG-----  | ---GLSAEAV  |
| Flounder_LAO1                               | ---VEEHGCS  | E-----     | ALKK       | YDHYTVKEYL | KTEG-----  | ---GLSSEAV  |
| Rockfish_LAO                                | ---VEASGCR  | A-----     | ALLK       | YDRYSVKDYL | KEEG-----  | ---GLSSEAV  |
| Green_pufferfish_LAO                        | ---VRTHGCE  | A-----     | AWSR       | YSRYSWKEYL | ETEG-----  | ---RLSPEAQ  |
| Zebrafish_LAO                               | ---LHKMGCE  | K-----     | MLNT       | YDSYSVKEYL | VNVA-----  | ---NLSRGAL  |
| Panda_IL4I1                                 | ---LKALGCR  | K-----     | AMKK       | FERHTLLEYL | LGEG-----  | ---NLSYPAV  |
| Dog_IL4I1                                   | ---LKTLLGCR | K-----     | AMRK       | FEKHTLLEYL | LGEG-----  | ---NLSQPAV  |
| Human_IL4I1                                 | ---LKALGCR  | K-----     | AMKK       | FERHTLLEYL | LGEG-----  | ---NLSRPAV  |
| Mouse_IL4I1                                 | ---LKALGCK  | K-----     | AMNK       | FNKHTLLEYL | LEEG-----  | ---NLSRPAV  |
| Streptosporangium_roseum_{Actinobacteria}   | ---YSAEGGA  | A--LDRLCAD | YDHHSIRSFL | RER-----   | ---        | GFSPGAV     |
| Roseiflexus_castenholzii_{Chloroflexi}      | ---VERDQGA  | G--WEQIYAT | YDEYSVREFL | ELQ-----   | ---        | GWSEGLI     |
| Bacillus_cereus_{Firmicutes}                | ---IKRNPEK  | N--WDVVVKD | FGRYSTGQFL | KYHPYQ---- | YNTYFSPVTI | EMIGVLLDLE  |
| Marseillevirus                              | --DWTRMFSN  | -----      | QK         | LNDSIYGESL | IQKG-----  | ---VSCGTI   |
| Aplysia_punctata_cyplasin_L_{Mollusks}      | TEVSDANAV   | SVFDDHLGED | GVGEEIH--- | -TVQEGMQKV | PEQLLRAFGN | SSVFGH----  |
| Aplysia_punctata_cyplasin_S_{Mollusks}      | TEVSDANAV   | SVFDDHLGED | GVGEEIH--- | -TVQEGMQKV | PEQLLRAFGN | SSVFGH----  |
| Aplysia_californica_aplysianin_A_{Mollusks} | SEVTSANAL   | SVFDDHLGED | GVGDNIL--- | -TVKNGMQKV | PKELIKKFRK | TSTLN-----  |
| Aplysia_punctata_ink_toxin_1_{Mollusks}     | GEVTLDASAV  | SLFDDHLGED | YYGSEIY--- | -TLKEGLSSV | PQGLLQAFLD | AADSN-----  |
| Aplysia_punctata_ink_toxin_2_{Mollusks}     | GEVTLGASAV  | SLFDDHLGED | YYGSEIY--- | -TLKEGLSSV | PQGLLQAFLD | AADSN-----  |
| Aplysia_punctata_ink_toxin_3_{Mollusks}     | GEVTLDASAV  | SLFDDHLGED | YYGSEIY--- | -TLKEGLSSV | PQGLLQTFLD | AADSN-----  |
| Aplysia_californica_escapin_{Mollusks}      | SEVTLDASAI  | SIFDDHLGED | YYGSEIY--- | -TLEEGMSSV | PQGLLQTFLD | AAKSN-----  |
| Achatina_fulica_achacin_{Mollusks}          | TEFIEGVSVA  | NYFLVELGER | --EEEIL--- | -TLTDGMSAL | PQALADAFLK | SSTSH-----  |
| Hahella_chejuensis_{Proteobacteria}         | ANVAN-ANAV  | TQLP--ATEY | SDET----   | QF         | LTLKHGFQSL | PLTLCEQFVQ  |
| Pseudomonas_entomophila_{Proteobacteria}    | ANVAN-ASAV  | TQLP--ATEY | SDAT----   | EF         | RTLKDGQSL  | PLTLAQRVFE  |
| Burkholderia_ubonensis_{Proteobacteria}     | TTLTN-WNAA  | DAIPWFLSDF | GVGA----   | SY         | MGFKKGFQEV | PKSVAGLFMQ  |
| Chromobacterium_violaceum_{Proteobacteria}  | STLCN-WNAA  | DAIPWYLSDF | GVDP----   | KY         | KGFCCKGFQV | PLSLAQLFEQ  |
| Chitinophaga_pinensis_{Bacteroidetes}       | STLVN-WNAC  | DAIPWYLSDF | GISP----   | KY         | KGFTNGFQV  | PIALAELEFEK |
| Flavobacterium_johnsoniae_{Bacteroidetes}   | SNTIN-WNSA  | EAFPYMVGDF | TAGT----   | IY         | KTIEEGYDSI | AYAVANSYME  |
| Dyadobacter_fermentans_{Bacteroidetes}      | SNTIN-WNSA  | EAFPYMVGDF | SADV----   | TY         | KTIGEGYDSI | AYALANQYTG  |
| Staphylococcus_aureus_{Firmicutes}          | SNTLS-WNSA  | EAFSYMVGDF | TDNV----   | EY         | KTIKNGYDQL | AYAIGEKVSK  |
| Clostridium_botulinum_{Firmicutes}          | -QFFGLSLT-  | --EMLQQYYT | VDHEY----  | T          | YRITDGMISL | PHSLY-----  |
| Clostridium_carboxidivorans_{Firmicutes}    | GALIDL SYN- | --EVLQEDYP | ENFSY----  | L          | YRVAGGNVNL | PIAFY-----  |
| Turkey_LAO                                  | SGFYLSFLA-  | --SLWDFDIF | SQGES----  | F          | DEITGGFDQL | PKAFH-----  |
| Chicken_LAO                                 | SGFYLSFLA-  | --SLWDFDIF | SNGES----  | F          | DEITGGFDQL | PKAFH-----  |
| Zebrafinch_LAO                              | SGFYLSFLA-  | --SLWDFDIF | SN-DS----  | F          | DEITGGFDQL | PRAFH-----  |
| Ophiophagus_hannah_{Elapidae}               | AGFHNSFLI-  | --SVMDFLFL | LN-NS----  | F          | DEITGGFDQL | PERFF-----  |
| Crotalus_atrox_{Viperidae}                  | SGYYVSFIE-  | --SLKHDDIF | GYEKR----  | F          | DEIVGMDQL  | PTSMY-----  |
| Sistrurus_catenatus_{Viperidae}             | SGYYVSFIE-  | --SLKHDDIF | GYEKR----  | F          | DEIVGMDQL  | PTSMY-----  |
| Gloydeus_halys_{Viperidae}                  | SGYYVSFPE-  | --SLRHDDIF | AYEKR----  | F          | DEIVGMDKL  | PTSMY-----  |
| Trimesurus_stejnegeri_{Viperidae}           | AGYYVSFIE-  | --SMKHDDIF | AYEKR----  | F          | DEIVDGMKL  | PTSMY-----  |
| Bothrops_jararacussu_{Viperidae}            | SGYYVSFIE-  | --SLKHDDIF | AYEKR----  | F          | DEIVGMDKL  | PTSMY-----  |



|                                             |            |            |            |              |             |            |
|---------------------------------------------|------------|------------|------------|--------------|-------------|------------|
| Chicken_LAO                                 | -----      | ---IKFNCT  | VEKIMTKGGK | VR-----      | VFYRAPDTLA  | PSI---VTAD |
| Zebrafinch_LAO                              | -----      | ---VRFNCT  | VEKIMTKDNK | VR-----      | VFYRAPDTLA  | PTV---LTAD |
| Ophiophagus_hannah_{Elapidae}               | -----      | ---VHLNST  | VEKIVHINNK | VT-----      | VFYEGLSTNM  | R-----LVAD |
| Crotalus_atrox_{Viperidae}                  | -----      | ---QVHFNAR | VEIQNDRE   | AT-----      | VTYQTSANEM  | SS----VTAD |
| Sistrurus_catenatus_{Viperidae}             | -----      | ---QVHFNAR | VEIQNDRE   | AT-----      | VTYQTSANEM  | SS----VTAD |
| Gloydeus_halys_{Viperidae}                  | -----      | ---VHLNAQ  | VIKIQNAEK  | VT-----      | VVYQTPAKEM  | AS----VTAD |
| Trimesurus_stejnegeri_{Viperidae}           | -----      | ---VHFNAQ  | VIKIQNAEE  | VT-----      | VTYQTPEKDT  | SF----VTAD |
| Bothrops_jararacussu_{Viperidae}            | -----      | ---VHLNAR  | VIKIQDVKE  | VT-----      | VTYQTSEKET  | LS----VTAD |
| Echis_ocellatus_{Viperidae}                 | -----      | ---VLFKAR  | VTKIQNAEK  | VR-----      | VTYQTAAKTL  | SD----VTAD |
| Oxyuranus_scutellatus_{Elapidae}            | -----      | ---VHLNAQ  | VIKIQHNAEK | VR-----      | VAYQTPAKTL  | SY----VTAD |
| Pseudechis_australis_{Elapidae}             | -----      | ---VHLNAQ  | VIKIQNAED  | VR-----      | VTYQTPAKTL  | SY----VIAD |
| Bungarus_multicinctus_{Elapidae}            | -----      | ---VHLNAQ  | VTKIQHDAEK | VR-----      | VAYQTPAKTL  | SY----VTAD |
| Demancia_vestigiata_{Elapidae}              | -----      | ---VHLNAR  | VIKIQNAEG  | VR-----      | VTYQTPAKNL  | SY----VTAD |
| Dog_LAO1                                    | -----      | ---TIRLGSK | VETVVRDGPT | VQ-----      | VSYRVGKHSS  | RLYT--LTAD |
| Panda_LAO1                                  | -----      | ---TIRLGSN | VETVVRDGPK | VQ-----      | VSYRVGKPGS  | ALRT--LTSD |
| Bovine_LAO1                                 | -----      | ---TIRLGSK | VEKVVRDGPE | VR-----      | ISYRMGETNS  | PLHT--LTAD |
| Horse_LAO1                                  | -----      | ---TIRLGSK | VETVVRDGPK | VR-----      | ISYRVDEPNS  | ELHT--LTAD |
| Mouse_LAO1                                  | -----      | ---TIRLGSK | VERVVRDGPK | VK-----      | VMYRTDGPTS  | ALHK--LTAD |
| Opossum_LAO1                                | -----      | ---TVRFHST | VEKLERDGDK | IR-----      | ITYRTERPHS  | VPVT--ITAD |
| Horse_LAO2                                  | -----      | ---TVWLHSP | AEEVETNGDR | VH-----      | ITYRTPDPLQ  | PRAR--LTAD |
| Opossum_LAO2                                | -----      | ---TVHLHSQ | AEEVVRDGDG | VH-----      | IIHQTPDPLQ  | PRAH--LTAD |
| Flounder_LAO3                               | -----      | ---ALLNSK  | VKRISRSDRG | VI-----      | ISYKKDK-QS  | FLTD--LKAD |
| Flounder_LAO2                               | -----      | ---ALLNSK  | VKRISRSDKG | VV-----      | ISYKKDK-QS  | FLTD--LEAD |
| Flounder_LAO1                               | -----      | ---ALLNSR  | VKRISRSETG | VF-----      | ISYQKDK-QS  | SLTD--LEAD |
| Rockfish_LAO                                | -----      | ---ILLNST  | VKRISQSDKG | VI-----      | VSYEKGQ-QS  | SLTD--LTAD |
| Green_pufferfish_LAO                        | -----      | ---VLLRSK  | VKRISQSDG  | VT-----      | VSYQRGQ-ES  | TLTH--LQAD |
| Zebrafish_LAO                               | -----      | ---ILMNSK  | VQAISQTQDG | VT-----      | VSYQDWRNLG  | EMTN--ITGD |
| Panda_IL4I1                                 | -----      | ---VLLHAP  | VVAITQGTHD | VR-----      | VHIASSRRAR  | SLKA--MTAD |
| Dog_IL4I1                                   | -----      | ---VLLHAP  | VVAITQGTHD | VR-----      | VHIASSRRAR  | SLKA--MTAD |
| Human_IL4I1                                 | -----      | ---VLLNAP  | VVAMTQGPHD | VH-----      | VQIETSPPAR  | NLKV--LKAD |
| Mouse_IL4I1                                 | -----      | ---LLNAP   | VVSITQGRND | VR-----      | VHIATS--LH  | SEKT--LTAD |
| Streptosporangium_roseum_{Actinobacteria}   | -----      | ---VHFHGE  | VHAIEQDDHS | VT-----      | LHVRT---AA  | GRTE--MTGD |
| Roseiflexus_castenholzii_{Chloroflexi}      | -----      | ---IRYGAR  | VIALDQTPHE | AI-----      | VHYQT---MS  | GRFQ--VTAD |
| Bacillus_cereus_{Firmicutes}                | -----      | ---IIYNQK  | LMKLHQHDNG | VT-----      | AFYRNEE-TF  | EYSS--ITGD |
| Marseillevirus                              | -----      | ---RLTNT   | EIVLGATLVS | -----        | --FDKLECK   | ILGVGKVKTK |
|                                             |            |            |            |              |             |            |
| Aplysia_punctata_cyplasin_L_{Mollusks}      | QIILALPVFA | LMQVDWPPLR | ENRAQK---- | -AYGAVRTIP   | ASKVFMTFDQ  | PWWLQN---- |
| Aplysia_punctata_cyplasin_S_{Mollusks}      | QIILALPVFA | LMQVDWPPLR | ENRAQK---- | -AYGAVRTIP   | ASKVFMTFDQ  | PWWLQN---- |
| Aplysia_californica_aplysianin_A_{Mollusks} | QVILALPVYA | LRRLDWPPLL | EDRAET---- | -AYA AVRNPMA | ASKVFMTFDQ  | AWWLDS---- |
| Aplysia_punctata_ink_toxin_1_{Mollusks}     | RVILAMPVYA | LNQLDWNQLR | NDRATQ---- | -AYA AVRNPPI | ASKVFMSFDQ  | PWWLEN---- |
| Aplysia_punctata_ink_toxin_2_{Mollusks}     | RVILAMPVYA | LTQLDWNQLR | NDRATQ---- | -AYA AVRNPPI | ASKVFMTFDQ  | PWWLEN---- |
| Aplysia_punctata_ink_toxin_3_{Mollusks}     | RVILAMPVYA | LNQLDWNQLR | NDRATQ---- | -AYA AVRNPPI | ASKVFMTFDQ  | PWWLEN---- |
| Aplysia_californica_escapin_{Mollusks}      | RVILAMPVYA | LRQLDWSQLR | NDRATQ---- | -AYRAVRPMP   | ASKVFMTFDQ  | PWWLQN---- |
| Achatina_fulica_achacin_{Mollusks}          | KVILAIPQSA | LIHLDWKPLR | SETVNE---- | -AFNAVKFIP   | TSKVFLTFPT  | AWWLSD---- |
| Hahella_chejuensis_{Proteobacteria}         | RVILAMPRRS | LELIQS--EF | FNDSWL---Q | ENLPSVLIQS   | AFKFLFLAYEK | PWWRN----  |
| Pseudomonas_entomophila_{Proteobacteria}    | QVILALPRRS | LELIDS--PL | FDDPWL---K | DNLKSVLVQS   | AFKFLFLAYEQ | PWWRN----  |
| Burkholderia_ubonensis_{Proteobacteria}     | QVILAMPRRA | IDLLAQSSAM | LEEIS----- | GLTSSVTPRP   | LFKFLFTTYAN | PWWRASGYTR |

|                                             |             |            |            |             |             |             |
|---------------------------------------------|-------------|------------|------------|-------------|-------------|-------------|
| Chromobacterium_violaceum_{Proteobacteria}  | TLILAMPRRS  | LELLTATSPA | LQDAKT---Q | ALISTVTPRP  | LFKLFTTYDS  | PWWRNTGCTV  |
| Chitinophaga_pinensis_{Bacteroidetes}       | KLILAMPARRA | LDLIMPDSP  | LKRIQ----- | PLISSVTPRP  | LFKLFTTYAN  | PWWRRIAGYTN |
| Flavobacterium_johnsoniae_{Bacteroidetes}   | SIVLAMPRRKS | LELLDQNNFF | FNVNENSVLN | ENIRSVIMEP  | AFKILMGFEY  | PWWKE-----  |
| Dyadobacter_fermentans_{Bacteroidetes}      | HIILGMPRRKS | LQLLDQENFF | FNANENARLC | GNIESVIMEP  | AFKILMGFPE  | PWWKK-----  |
| Staphylococcus_aureus_{Firmicutes}          | HIILAMPKRS  | LELLDQDNFF | FEDASNSKLR | KLVDTVYAEP  | SLKLLLGFD   | PWWKEC----  |
| Clostridium_botulinum_{Firmicutes}          | YVICAIPFSS  | LRRJETGP-- | LFTTK---KV | QAINEMNYEI  | AHKIYLYFKE  | RFWEMGN---- |
| Clostridium_carboxidivorans_{Firmicutes}    | YVICAIPFTT  | LSTMDIAP-- | FFSNR---KM | QAIRESINYVD | GHRITLLCKK  | RFWEENA---- |
| Turkey_LAO                                  | YVLVASSAKA  | TRHIQFFP-- | PLSPT---KN | DALRSIHYAS  | ASKIALVCTE  | KFWEK-----  |
| Chicken_LAO                                 | YVLVTSSAKA  | TRHIQFFP-- | PLSPA---KN | EALRSIHYAS  | ASKIALACTE  | KFWEK-----  |
| Zebrafinch_LAO                              | FVLVTSSAKA  | TRHIRFLP-- | PLSPA---KA | HALRSIYYAS  | ASKIILVCSE  | KFWEK-----  |
| Ophiophagus_hannah_{Elapidae}               | YVLITATARA  | TRLIKFVP-- | PLSIP---KT | RALRSLIYAS  | ATKIILVCTD  | KFWEK-----  |
| Crotalus_atrox_{Viperidae}                  | YVIVCTTSRA  | ARRIKFEP-- | PLPPK---KA | HALRSVHYRS  | GTKIFLTCTK  | KFWED-----  |
| Sistrurus_catenatus_{Viperidae}             | YVIVCTTSRA  | ARRIKFEP-- | PLPPK---KA | HALRSVHYRS  | GTKIFLTCTK  | KFWED-----  |
| Gloydeus_halys_{Viperidae}                  | YVIVCTTSRA  | TRRIKFEP-- | PLPPK---KA | HALRSVHYRS  | GTKIFLTCTK  | KFWED-----  |
| Trimesurus_stejnegeri_{Viperidae}           | YVIVCTTSGA  | ARRIKFEP-- | PLPLK---KA | HALRSVHYRS  | GTKIFLTCTK  | KFWED-----  |
| Bothrops_jararacussu_{Viperidae}            | YVIVCTTSRA  | ARRIKFEP-- | PLPPK---KA | HALRSVHYRS  | GTKIFLTCTK  | KFWED-----  |
| Echis_ocellatus_{Viperidae}                 | YVIVCTTSRA  | ARRINFKP-- | PLPPK---KA | HALRSVHYRS  | ATKIFLTCTK  | KFWED-----  |
| Oxyuranus_scutellatus_{Elapidae}            | YVIVCSTTSA  | ARRIYFEP-- | PLPPK---KA | HALRSIHYKS  | GTKIFLTCSK  | KFWEA-----  |
| Pseudechis_australis_{Elapidae}             | YVIVCSTTSA  | ARRIHFEF-- | PLPPK---KA | HALRSIHYRS  | STKIFLTCSQ  | KFWEA-----  |
| Bungarus_multicinctus_{Elapidae}            | YVIVCATSRA  | VRRISFEP-- | PLPSK---KA | HALRSIHYKS  | ATKIFLTCTQ  | KFWEA-----  |
| Demancia_vestigiata_{Elapidae}              | YVIVCSTSRA  | ARRIYFEP-- | PLPPE---KA | HALQSIHYRS  | ATKIFLTCTK  | KFWED-----  |
| Dog_LAO1                                    | FVVIITASAKA | TRLITFKP-- | LLSPD---KM | EALRLVHYTS  | ATKVALVCEE  | LFWEQ-----  |
| Panda_LAO1                                  | FVVIITASAKA | TRLITFKP-- | PLSLD---KM | EALRLVHYTS  | ATKVILACKE  | PFWER-----  |
| Bovine_LAO1                                 | FVVIISASAKA | THLITFEP-- | PLSQD---KM | DALRSVHYTS  | ATKVVLACNE  | SFWER-----  |
| Horse_LAO1                                  | FVVIISASAKA | TRLITFKP-- | ALSPD---KV | DALRSVHYTS  | ATKVILACNE  | PFWER-----  |
| Mouse_LAO1                                  | YAIITASAKA  | TRLITFQP-- | PLSRE---KT | HALRSVHYTS  | ATKVVLVCNE  | RFWEQ-----  |
| Opossum_LAO1                                | FAIISPTAKA  | TRLIQFEP-- | PLSLA---KQ | DALRSIHYTS  | ATKVALVCKE  | PFWEQ-----  |
| Horse_LAO2                                  | YVIVASTAKA  | ARLLHFQP-- | PLSPG---KQ | DALRSVHYNS  | ATKVILACTQ  | RFWED-----  |
| Opossum_LAO2                                | YAIVATTAKA  | ARLLHFHP-- | PLSPG---KE | DALRSVHYNS  | ATKVILACTK  | RFWEQ-----  |
| Flounder_LAO3                               | AVLVTTTTKA  | ALFIEFEP-- | PLPVD---KI | EALRSVHYAS  | STKIILTFSE  | KFWER-----  |
| Flounder_LAO2                               | AVLVTTTTKA  | ALFIEFDP-- | PLPVD---KM | EALRSVHYGS  | STKIILTFSE  | KFWEK-----  |
| Flounder_LAO1                               | AVLVTTTTKA  | ALFIDFDP-- | PLPIK---KM | EALRVVHYDS  | STKIILTFSE  | KFWER-----  |
| Rockfish_LAO                                | VVLVTTTTKA  | ALFMDFDP-- | PLPIK---KM | EALRAAHYDS  | STKILLTFSE  | RFWEK-----  |
| Green_pufferfish_LAO                        | AVVVTTTARA  | ALFIDFVP-- | SLSIK---KK | EALRAAHYMG  | LTKVFLTFSQ  | RFWEK-----  |
| Zebrafish_LAO                               | YVLVTSTAKA  | TLFFDFNP-- | PLSAD---KM | EALRSVHYSS  | STKVVLFSFSQ | KFWKNN----  |
| Panda_IL4I1                                 | VVLLTASGPA  | LQRITFSP-- | PLSRR---RE | EALRALHYVP  | ATKVFLSFRR  | PFWHD-----  |
| Dog_IL4I1                                   | VVLLTASGPA  | LQRITFSP-- | PLSRR---RQ | EALRALHYVP  | ATKVFLSFRR  | PFWHD-----  |
| Human_IL4I1                                 | VVLLTASGPA  | VKRITFSP-- | PLPRH---MQ | EALRRLHYVP  | ATKVFLSFRR  | PFWRE-----  |
| Mouse_IL4I1                                 | VVLLTASGPA  | LQRITFSP-- | PLTRK---RQ | EALRALHYVA  | ASKVFLSFRR  | PFWHE-----  |
| Streptosporangium_roseum_{Actinobacteria}   | YAVCTMPFV   | LRDIEVRP-- | AFTRR---KQ | RAIRELNYNA  | STKILFQVRE  | RFWEHT----  |
| Roseiflexus_castenholzii_{Chloroflexi}      | DAIITVPPFV  | LRHIETLK-- | PFSRA---KQ | RAIRQLHYDA  | AAKIFFQCR   | RFWETD----  |
| Bacillus_cereus_{Firmicutes}                | LVIVTIPFST  | MRFVEVDFD  | SISHE---KW | KAIRELHYMP  | ATKIGIQFKS  | RFWE-E----  |
| Marseillevirus                              | NLILALPPNA  | LCLLGIDY-- | -----      | ---FPYVENWS | AFKAFFIVPD  | ETWRILS---- |
|                                             |             |            |            |             |             |             |
| Aplysia_punctata_cyplasin_L_{Mollusks}      | -----DVT    | DFPAFVTKGD | TFFSQMYDWK | KSNVS-----  | -----       | ---GDYILIA  |
| Aplysia_punctata_cyplasin_S_{Mollusks}      | -----DVT    | DFPAFVTKGD | TFFSQMYDWK | KPNVS-----  | -----       | ---GDYILIA  |
| Aplysia_californica_aplysianin_A_{Mollusks} | -----DFT    | NSSAYVTKGD | TPFSQMYDWK | KSNVS-----  | -----       | ---GDFILIA  |

|                                            |             |            |             |            |            |               |
|--------------------------------------------|-------------|------------|-------------|------------|------------|---------------|
| Aplysia_punctata_ink_toxin_1_{Mollusks}    | -----ERK    | ---SWVTKSD | ALFSQMYDWQ  | KSEAS----- | -----      | ---GDYILIA    |
| Aplysia_punctata_ink_toxin_2_{Mollusks}    | -----ERK    | ---SWVTKSD | ALFSQMYDWQ  | KSEAS----- | -----      | ---GDYILIA    |
| Aplysia_punctata_ink_toxin_3_{Mollusks}    | -----ERK    | ---SWVTKSD | ALFSQMYDWQ  | KSEAS----- | -----      | ---GDYILIA    |
| Aplysia_californica_escapin_{Mollusks}     | -----ERK    | ---SWVTKSD | ALFSQMYDWQ  | KSEAS----- | -----      | ---GDYILIA    |
| Achatina_fulica_achacin_{Mollusks}         | -----AVK    | N-PAFVVKST | SPFNQMYDWK  | SSNVT----- | -----      | ---GDAAMIA    |
| Hahella_chejuensis_{Proteobacteria}        | -----L      | GLVAGRSVTD | LPVVRQIYYMG | TECEQPGGEP | -----      | --FLNSLLMA    |
| Pseudomonas_entomophila_{Proteobacteria}   | -----L      | GLVAGRSVTD | LPVVRQIYYMG | TECDQPGGEP | -----      | --TFNSLLMA    |
| Burkholderia_ubonensis_{Proteobacteria}    | TTATGESEYV  | PVELGRSVTD | LPVVRQIYYWP | KSDGTAATG- | -----      | ---GPSMLLA    |
| Chromobacterium_violaceum_{Proteobacteria} | SGTDGKPVYA  | AVEAGRSVTD | LPVVRQIYYWP | KDNGKPATS- | -----      | ---GHAMLLA    |
| Chitinophaga_pinensis_{Bacteroidetes}      | -----AEGKFV | PVQSGRSVTD | LPVVRQIYYWP | NSDGTPAVN- | -----      | ---GRAMLLA    |
| Flavobacterium_johnsoniae_{Bacteroidetes}  | -----L      | GIDSGHSITD | LPMRQCYFYG  | TDKKT----- | -----      | ---KNSMLLG    |
| Dyadobacter_fermentans_{Bacteroidetes}     | -----L      | GIDSGHSITD | LPMRQCYFYG  | TDEQT----- | -----      | ---NNAMLLG    |
| Staphylococcus_aureus_{Firmicutes}         | -----L      | GAEHGKSTTD | LPMRQCYFYG  | TDEAN----- | -----      | ---NKSLLLA    |
| Clostridium_botulinum_{Firmicutes}         | -----ASK    | KIIGGSTYTD | LP-LVSMYYP  | SDHSRPVTNK | YGKWLKAGA  | SPEEAGVLLA    |
| Clostridium_carboxidivorans_{Firmicutes}   | -----DYG    | RIVGGVSNTD | LS-ITNILYP  | SDH-----   | -----VMTGA | NPNEPGVLIG    |
| Turkey_LAO                                 | -----D      | GIRGGQSITD | RP-SRFIYYP  | SHNF-----  | -----      | ---SSGVGVILA  |
| Chicken_LAO                                | -----D      | GIQGGQSITD | RP-SRFIYYP  | SHNF-----  | -----      | ---SSGVGVILA  |
| Zebrafinch_LAO                             | -----D      | GIRGGYSVTD | RP-SRFIYYP  | SHNF-----  | -----      | ---SSGVGVLLA  |
| Ophiophagus_hannah_{Elapidae}              | -----D      | GIHGGRSITD | LP-SRVIYYP  | NHDF-----  | -----      | ---TNGIGVLLA  |
| Crotalus_atrox_{Viperidae}                 | -----D      | GIRGGKSTTD | LP-SRFIYYP  | NHNF-----  | -----      | ---TSGVGVIIA  |
| Sistrurus_catenatus_{Viperidae}            | -----E      | GIHGGKSTTD | LP-SRSIYYP  | NHNF-----  | -----      | ---TSGVGVIIA  |
| Gloydeus_halys_{Viperidae}                 | -----E      | GIHGGKSTTD | LP-SRFIYYP  | NHNF-----  | -----      | ---TSGVGVIIA  |
| Trimesurus_stejnegeri_{Viperidae}          | -----E      | GIHGGKSTTD | LP-SRFIYYP  | NHNF-----  | -----      | ---TSGVGVIIA  |
| Bothrops_jararacussu_{Viperidae}           | -----D      | GIHGGKSTTD | LP-SRFIYYP  | NHNF-----  | -----      | ---PNGVGVIIA  |
| Echis_ocellatus_{Viperidae}                | -----D      | GIQGGKSTTD | LP-SRFIYYP  | NHNF-----  | -----      | ---TSGVGVIIA  |
| Oxyuranus_scutellatus_{Elapidae}           | -----D      | GIHGGKSTTD | LP-SRFIYYP  | NHNF-----  | -----      | ---TSGVGVIVA  |
| Pseudechis_australis_{Elapidae}            | -----D      | GIHGGKSTTD | LP-SRFIYYP  | NHSF-----  | -----      | ---TSGIGVIVA  |
| Bungarus_multicinctus_{Elapidae}           | -----D      | GIHGGKSTTD | LP-SRFIYYP  | NHNF-----  | -----      | ---TSGVGVIVA  |
| Demancia_vestigiata_{Elapidae}             | -----D      | GIHGGKSTTD | RP-SRLIHP   | NHNF-----  | -----      | ---PNGIGVLVI  |
| Dog_LAO1                                   | -----D      | GIRGGFSITD | RP-SRHIYYP  | SHSF-----  | -----      | ---PQKGVILLA  |
| Panda_LAO1                                 | -----D      | GIRGGVSITD | RP-SRHIYYP  | SHSF-----  | -----      | ---PSGKSILLA  |
| Bovine_LAO1                                | -----D      | GIQGGVSITD | LP-SRYIYYP  | SHRL-----  | -----      | ---PSGKGVLLA  |
| Horse_LAO1                                 | -----D      | GIRGGVSITD | RP-SRYIYYP  | SHSL-----  | -----      | ---PSGKGVLLA  |
| Mouse_LAO1                                 | -----D      | GIRGGYSITD | RP-SRFIYYP  | SHSL-----  | -----      | ---PGKGVLLA   |
| Opossum_LAO1                               | -----D      | NIKGGATITD | LP-TRFVYYP  | SHDF-----  | -----      | ---PGNIGVLLA  |
| Horse_LAO2                                 | -----E      | GIFGGKSSTD | RP-SRFIYYP  | SHIF-----  | -----      | ---PNGTGVILA  |
| Opossum_LAO2                               | -----D      | GIYGGKSITD | RP-SRFIFYP  | NHDF-----  | -----      | ---PNGTGVILA  |
| Flounder_LAO3                              | -----D      | GIKGGKSITD | RP-SRFIYYP  | SHGF-----  | -----      | ---INKDIGVLLA |
| Flounder_LAO2                              | -----D      | GIKGGKSITD | RP-SRFIYYP  | SHSF-----  | -----      | ---INKDIGVLLA |
| Flounder_LAO1                              | -----D      | GIKGGKSITD | RP-SRFIYYS  | SHSF-----  | -----      | ---QIKDIGVLLA |
| Rockfish_LAO                               | -----D      | GIRGGKSITD | GP-SRYIYYP  | SHSFP----- | -----      | ---TNKNIGVLLA |
| Green_pufferfish_LAO                       | -----E      | GIRGGKSITD | RP-SRVIHP   | SHSFP----- | -----      | ---DNQTAGVLLA |
| Zebrafish_LAO                              | -----D      | GIKGGKSITD | LP-SRFIYYP  | SHEF-----  | -----      | ---PGITGGAILA |
| Panda_IL4I1                                | -----E      | HIEGGHSSTA | RP-SRVIFYP  | PPGE-----  | -----      | ---GALLLA     |
| Dog_IL4I1                                  | -----E      | HIEGGHSSTA | RP-SRVIFYP  | PPGE-----  | -----      | ---GALLLA     |
| Human_IL4I1                                | -----E      | HIEGGHSNTD | RP-SRMIFYP  | PPRE-----  | -----      | ---GALLLA     |
| Mouse_IL4I1                                | -----E      | HIEGGHSNTD | RP-SRLIFYP  | AQGE-----  | -----      | ---GSLLLA     |

|                                             |            |            |            |            |            |            |
|---------------------------------------------|------------|------------|------------|------------|------------|------------|
| Streptosporangium_roseum_{Actinobacteria}   | -----D     | GIVGGTTVTD | LP-VRRICYP | SHSD-----  | -----      | PDERRGVLLA |
| Roseiflexus_castenholzii_{Chloroflexi}      | -----D     | GIDGGGTVD  | LP-IRNLYYT | DWG-----   | -----      | AETGRGVLLA |
| Bacillus_cereus_{Firmicutes}                | -----Q     | GQLGGRIITD | LP-IRYAYYP | SHGI-----  | -----      | GEKGFAMMLG |
| Marseillevirus                              | -----LD    | GQRKGRNVSS | GVARQIWFYS | EKPY-----  | -----      | -----VLM   |
|                                             |            |            |            |            |            |            |
| Aplysia_punctata_cyplasin_L_{Mollusks}      | SYADGNNTLF | QRVLRDQGEP | INGSEAGAH  | VSEPLKNQIL | DHLA-----  | -----      |
| Aplysia_punctata_cyplasin_S_{Mollusks}      | SYADGSTQPW | IH-----    | -----      | -----      | -----      | -----      |
| Aplysia_californica_aplysianin_A_{Mollusks} | SYADGNNTLY | QRVLRDHGQP | INGSEPGSHI | VSEPLKEYIL | HHLS-----  | -----      |
| Aplysia_punctata_ink_toxin_1_{Mollusks}     | SYADGLKAQY | LRELKNQGED | IPGSDPGYNQ | VTEPLKDTIL | DHLT-----  | -----      |
| Aplysia_punctata_ink_toxin_2_{Mollusks}     | SYADGLKAQY | LRELKNQGED | IPGSDPGYNQ | VTEPLKDTIL | DHLT-----  | -----      |
| Aplysia_punctata_ink_toxin_3_{Mollusks}     | SYADGLKAQY | LRELKNQGED | IPGSDPGYNQ | VTEPLKDTIL | DHLT-----  | -----      |
| Aplysia_californica_escapin_{Mollusks}      | SYADGLKAQY | LRELKNQGED | IPGSDPGYNQ | VTVPLKDAIL | EHLT-----  | -----      |
| Achatina_fulica_achacin_{Mollusks}          | SYADTSDTKF | QENLNSKGL  | IPGSAPGANR | VTVALKEELL | SQLS-----  | -----      |
| Hahella_chejuensis_{Proteobacteria}         | SYNDIGTVPF | WKGLEDGLPF | IG----YKPS | CLETEISADR | IVPR-----  | -----T     |
| Pseudomonas_entomophila_{Proteobacteria}    | SYNDIGTVPF | WKGLEDGPEF | VG----YTPR | SLEGRIANDA | VVPR-----  | -----T     |
| Burkholderia_ubonensis_{Proteobacteria}     | SYDDGTNVGF | WDGLRPQRGQ | ARQGGREVAE | VTDPFIGADA | DLA-----   | ----DELPHW |
| Chromobacterium_violaceum_{Proteobacteria}  | SYDDGDNTGF | WDGLRAKRRQ | PRARGLDVAP | LADPFIGVDD | DVMR-----  | ----NELEWH |
| Chitinophaga_pinensis_{Bacteroidetes}       | SYDDGNNIGF | WDGLRPQRSA | AWRAGLSHAK | IADPFIGDDD | QKIDGKNAAP | VQQQLNQTDW |
| Flavobacterium_johnsoniae_{Bacteroidetes}   | SYGDMETETF | WKALSDDK-- | --VLFEVKAA | KSASLKELHQ | LNDV-----  | -----      |
| Dyadobacter_fermentans_{Bacteroidetes}      | SYGDMETETF | WKALSENE-- | --VLFKVRAA | RSASLDELKA | LEHE-----  | -----      |
| Staphylococcus_aureus_{Firmicutes}          | SYNDMRTVNF | WKSMMKSKEN | KCIKLDVSKS | KCELDLYNE  | EYSD-----  | -----      |
| Clostridium_botulinum_{Firmicutes}          | SYSWCQEA-V | RLGNENPELQ | IDDVMYRIEK | AHGLSPH--- | -----      | -----      |
| Clostridium_carboxidivorans_{Firmicutes}    | SYNLNKYA-T | HIGAIKGDH  | FQQVKRQVEQ | VHGLPRN--- | -----      | -----      |
| Turkey_LAO                                  | SYTWNNDA-D | FLMPLADEKY | LDLVLQDLAD | IHQVSKS--- | -----      | -----      |
| Chicken_LAO                                 | SYTWNNDA-E | FLIPLADEKY | LDVVLQDLSD | IHRVSKS--- | -----      | -----      |
| Zebrafinch_LAO                              | SYTWNSDA-E | FFLPLSDEKC | LDVVLQDLAD | IHQVSKS--- | -----      | -----      |
| Ophiophagus_hannah_{Elapidae}               | SYTWYSDS-E | FYTTLSDKEC | VDVVMDDLVE | IHNVSKD--- | -----      | -----      |
| Crotalus_atrox_{Viperidae}                  | -YGIGDDA-N | FFQALDFKDC | ADIVINDLSL | IHQLPKE--- | -----      | -----      |
| Sistrurus_catenatus_{Viperidae}             | -YGIGDDA-N | FFQALDFKDC | ADIVINDLSL | IHQLPKE--- | -----      | -----      |
| Gloydeus_halys_{Viperidae}                  | -YGIGDDA-N | FFQALDFKDC | ADIVINDLSL | IHQLPKE--- | -----      | -----      |
| Trimesurus_stejnegeri_{Viperidae}           | -YGIGDDA-N | FFQALDLKDC | GDIVINDLSL | IHQLPKE--- | -----      | -----      |
| Bothrops_jararacussu_{Viperidae}            | -YGIGDDA-N | YFEALDFEDC | GDIVINDLSL | IHQLPKE--- | -----      | -----      |
| Echis_ocellatus_{Viperidae}                 | -YGIGDDA-N | FFLSLTLNEC | ADIVFSDLSS | IHQLPKN--- | -----      | -----      |
| Oxyuranus_scutellatus_{Elapidae}            | -YTISSDA-D | FFQSLDIKTS | ADIVINDLSL | IHQLPKK--- | -----      | -----      |
| Pseudechis_australis_{Elapidae}             | -YTLADDT-D | FFQALDIETS | ADIVINDLSL | IHQLPKE--- | -----      | -----      |
| Bungarus_multicinctus_{Elapidae}            | -YVLADDS-D | FFQALDIKTS | ADIVINDLSL | IHQLPKN--- | -----      | -----      |
| Demancia_vestigiata_{Elapidae}              | -YTIADDA-D | FFLALDNKTI | ADIVIHDLSL | IHQLPKE--- | -----      | -----      |
| Dog_LAO1                                    | -YTVDDDS-R | FFTSMTHEQM | EDVLEDVAA  | LHQIPKD--- | -----      | -----      |
| Panda_LAO1                                  | SYTVDDDS-L | FFTSMTHEQM | EDVLEDVAA  | VHQIPKD--- | -----      | -----      |
| Bovine_LAO1                                 | SYTVDKDS-L | FFISMQRDQV | VDIVLRDLAA | VHQIPKE--- | -----      | -----      |
| Horse_LAO1                                  | SYTVDDDS-L | FFISMKHDQV | VDIVLEDLAA | VHQIPKG--- | -----      | -----      |
| Mouse_LAO1                                  | SFTVGGDS-S | FFAALKPNQV | VDVVLDDLAA | VHRIPKE--- | -----      | -----      |
| Opossum_LAO1                                | SYTVGGDS-T | FFAGMKHEKV | VDLVLGDLAT | IHQRPKK--- | -----      | -----      |
| Horse_LAO2                                  | SYTVDDDS-S | FFAAMDHTRA | VDVVLDDLAA | VHHRPKE--- | -----      | -----      |
| Opossum_LAO2                                | SYTLDDDS-T | FFAAMDQKRV | VDIVLEDLAA | VHNRPKE--- | -----      | -----      |
| Flounder_LAO3                               | SYTWEEDS-L | LFLGATDEDL | KELVLKDLAA | IHG---K--- | -----      | -----      |
| Flounder_LAO2                               | SYTWAEDS-L | LFLGATDENL | KELVLGDLAA | IHG---E--- | -----      | -----      |

|                                             |            |            |            |             |            |            |
|---------------------------------------------|------------|------------|------------|-------------|------------|------------|
| Flounder_LA01                               | SYTWSDDS-L | LFLGATDEDL | KELVLGLDAA | IHG---E---  | -----      | -----      |
| Rockfish_LAO                                | SYTWSDDS-L | LFLGASDEDL | KELALRDLAK | IHG---E---  | -----      | -----      |
| Green_pufferfish_LAO                        | SYTWSDDS-E | TLAGASDEV  | KDLLLRDLEQ | LHG---R---  | -----      | -----      |
| Zebrafish_LAO                               | SYTTSDDA-T | LLQTLDEEEL | KAVVNLNLVK | IHG---E---  | -----      | -----      |
| Panda_IL4I1                                 | SYTWSEAA-G | LFAGLSTEDA | MRVALDDVAA | LHG--PI---  | -----      | -----      |
| Dog_IL4I1                                   | SYTWSGAA-A | TFAGLSAEDA | MRVALDDVAA | LHG--PI---  | -----      | -----      |
| Human_IL4I1                                 | SYTWSGAA-A | AFAGLSREEA | LRLALDDVAA | LHG--PV---  | -----      | -----      |
| Mouse_IL4I1                                 | SYTWSGAA-A | PFAGLSTDQT | LRLVLQDVAA | LHG--PV---  | -----      | -----      |
| Streptosporangium_roseum_{Actinobacteria}   | SYTWGQDA-L | RWGAMSREKR | IQQAVEDVAK | VHP-----    | -----      | -----      |
| Roseiflexus_castenholzii_{Chloroflexi}      | SYTWAEDA-Q | RWGSLSPDR  | IEQALENVAV | IHP-----    | -----      | -----      |
| Bacillus_cereus_{Firmicutes}                | SYTWSYDA-L | LWDGLSKGDR | IYYALHNLAT | ILGG-----   | -----      | -----      |
| Marseillevirus                              | LYCDNASGVF | WRNKIPKEHN | GKFESCKKYP | ELTENFR---  | -----      | -----      |
|                                             |            |            |            |             |            |            |
| Aplysia_punctata_cyplasin_L_{Mollusks}      | --DAFGVP-- | -----      | -----RS    | DIQEPKTAVS  | KFWTDYPFGC | GWITWRAGYH |
| Aplysia_punctata_cyplasin_S_{Mollusks}      | -----      | -----      | -----      | -----       | -----      | -----      |
| Aplysia_californica_aplysianin_A_{Mollusks} | --EAYGVD-- | -----      | -----RS    | AIPEPKTAVS  | QFWDYPPFGS | GWITWRAGYH |
| Aplysia_punctata_ink_toxin_1_{Mollusks}     | --EAYGVE-- | -----      | -----RD    | SIPEPVTAAS  | QFWDYPPFGC | GWITWRAGFH |
| Aplysia_punctata_ink_toxin_2_{Mollusks}     | --EAYGVE-- | -----      | -----RD    | SIREPVTAAS  | QFWDYPPFGC | GWITWRAGFH |
| Aplysia_punctata_ink_toxin_3_{Mollusks}     | --EAYGVE-- | -----      | -----RD    | SIPEPVTAAS  | QFWDYPPFGC | GWITWRAGFH |
| Aplysia_californica_escapin_{Mollusks}      | --EAYGVE-- | -----      | -----RD    | SIPEPVTAAS  | QFWDYPPFGC | GWITWRAGYH |
| Achatina_fulica_achacin_{Mollusks}          | --QAYGIE-- | -----      | -----RS    | DIPEPKSGTS  | QFWSSYPFEG | DWTVWKAGYH |
| Hahella_chejuensis_{Proteobacteria}         | RYQVSEDMVR | AAQQQVRQVH | D-----QV   | ELPEPYSAVY  | HAWDDDPYGG | GWHEWKANYR |
| Pseudomonas_entomophila_{Proteobacteria}    | QFQISDEMVR | IAQRQVTLQH | A-----QV   | ELPAPYSAVY  | HAWDADPYGG | GWHEWKANYR |
| Burkholderia_ubonensis_{Proteobacteria}     | RYHAPRRMVA | EVARQLATVH | G-----LA   | HTPEVRNAAF  | RDWGDPPYGG | GWNSWNIGVK |
| Chromobacterium_violaceum_{Proteobacteria}  | QYKAPRMMTE | EVTQRLTVMH | S-----LS   | YTPKVRNAAY  | RDWGDPPFGG | GWNSWNIGVK |
| Chitinophaga_pinensis_{Bacteroidetes}       | EYQAPRRMVA | EIARQLQMQH | G-----LD   | YTPLVKSAAF  | RDWGEDPYGG | GWNSWNIGIR |
| Flavobacterium_johnsoniae_{Bacteroidetes}   | --QATKLMVD | ELMNQLRELH | GK-----DV  | TIPEPVVITYF | KDWTDEPFGA | GYHAWKAGFS |
| Dyadobacter_fermentans_{Bacteroidetes}      | --QATQLMVN | EIMSQLRELH | GH-----EV  | EIPEPVVITYF | RDWSDDPFGA | GYHAWKAGVA |
| Staphylococcus_aureus_{Firmicutes}          | --EVTNVMVK | ESIEELKELH | -----DI    | EIPMPYVAMV  | KDWSADPFGG | GYHAWYTGIN |
| Clostridium_botulinum_{Firmicutes}          | -----      | -----      | -----Y     | LDDKLIDYKS  | LIWSDVQYIW | TAGTLSKPED |
| Clostridium_carboxidivorans_{Firmicutes}    | -----      | -----      | -----Y     | LDSIVTQSKF  | IHWNNNEWFR | GAVAFFTPYQ |
| Turkey_LAO                                  | -----      | -----      | -----Y     | LQYTCDRYVI  | QKWQLDRHSL | GAFAAFTPYQ |
| Chicken_LAO                                 | -----      | -----      | -----Y     | LQYTCDRYVI  | QKWQLDRHSL | GAFAAFTPYQ |
| Zebrafinch_LAO                              | -----      | -----      | -----Y     | LQYTCQHLV   | QKWQLDRHSL | GAFAHFTPFQ |
| Ophiophagus_hannah_{Elapidae}               | -----      | -----      | -----Y     | LKSVCGKHVV  | QKWALDQYSM | GAFSTYTPYQ |
| Crotalus_atrox_{Viperidae}                  | -----      | -----      | -----D     | IQTFCRPSMI  | QRWSLDKYAM | GGITFTTPYQ |
| Sistrurus_catenatus_{Viperidae}             | -----      | -----      | -----D     | IQTFCRPSMI  | QRWSLDKYAM | GGITFTTPYQ |
| Gloydeus_halys_{Viperidae}                  | -----      | -----      | -----E     | IQTFCYPSMI  | QKWSLDKYAM | GGITFTTPYQ |
| Trimesurus_stejnegeri_{Viperidae}           | -----      | -----      | -----E     | IQTFCYPSMI  | QKWSLDKYAM | GGITFTTPYQ |
| Bothrops_jararacussu_{Viperidae}            | -----      | -----      | -----E     | IQAICRPSMI  | QRWSLDKYAM | GGITFTTPYQ |
| Echis_ocellatus_{Viperidae}                 | -----      | -----      | -----D     | IQKFCNPSVI  | QKWSLDKYAM | GAITFTTPYQ |
| Oxyuranus_scutellatus_{Elapidae}            | -----      | -----      | -----E     | IQALCYPSMI  | KKWSLDKYAM | GSITSFAPYQ |
| Pseudechis_australis_{Elapidae}             | -----      | -----      | -----Q     | IQALCYPSKI  | QKWSLDEYAM | GAITSFTPYQ |
| Bungarus_multicinctus_{Elapidae}            | -----      | -----      | -----E     | IQALCYPSLI  | KKWSLDKYTM | GALTSFTPYQ |
| Demancia_vestigiata_{Elapidae}              | -----      | -----      | -----K     | IRDLCYVSMI  | KKWSLDKYSM | GSITTFAPYQ |
| Dog_LA01                                    | -----      | -----      | -----K     | LRRMCPSSVI  | KRWSLDPFTM | GAFAEFTPYQ |
| Panda_LA01                                  | -----      | -----      | -----E     | LRRICPSSVA  | KRWSLDPLAM | GAFAEFTPYQ |



|                                             |             |            |           |            |            |            |
|---------------------------------------------|-------------|------------|-----------|------------|------------|------------|
| Bovine_LAO1                                 | -----       | -----      | -----E    | LRRMCPSSVV | KRWSLDPLFM | GAFTEFTPYQ |
| Horse_LAO1                                  | -----       | -----      | -----E    | LRRMCPSSVL | KRWSLDPLTM | GAFTEFTPYQ |
| Mouse_LAO1                                  | -----       | -----      | -----E    | LKRMCPKSAI | KHWSLDPLTI | GAFTEFTPYQ |
| Opossum_LAO1                                | -----       | -----      | -----E    | LQKLCQTSVV | KRWTLDPFPL | GAFTEFTPYQ |
| Horse_LAO2                                  | -----       | -----      | -----E    | LRTLCPYSMV | KHWQDPYSM  | GGFAFFTPYQ |
| Opossum_LAO2                                | -----       | -----      | -----E    | LQALCPYSVV | KRWSQDSYSM | GCFAFFTPYQ |
| Flounder_LAO3                               | -----       | -----      | -----Y    | VRHLCTGVVV | KKWSLDPYSL | GAFALFTPYQ |
| Flounder_LAO2                               | -----       | -----      | -----Y    | VRHLCTGVVV | KKWSLDPYSL | SAFALFTPYQ |
| Flounder_LAO1                               | -----       | -----      | -----Y    | VRSLCTGVVV | KKWSLDPYSL | GAFALFTPYQ |
| Rockfish_LAO                                | -----       | -----      | -----H    | VRSLCTGVLV | KKWSMDPYSL | GAFALFTPYQ |
| Green_pufferfish_LAO                        | -----       | -----      | -----Q    | VWALCTGVLV | KRWQDPFNL  | GGVAILTPYQ |
| Zebrafish_LAO                               | -----       | -----      | -----H    | IRQLCTGGAV | KKWMDPYSH  | GAFALFTPFQ |
| Panda_IL4I1                                 | -----       | -----      | -----V    | YRLWDGSGII | KRWAEDPHSQ | GGFVVQPPTL |
| Dog_IL4I1                                   | -----       | -----      | -----V    | YRLWDGSGIV | KRWGEDPHSQ | GGFVVQPPLL |
| Human_IL4I1                                 | -----       | -----      | -----V    | RQLWDGTGVV | KRWAEDQHSQ | GGFVVQPPAL |
| Mouse_IL4I1                                 | -----       | -----      | -----V    | FRLWDGRGVV | KRWAEDPHSQ | GGFVVQPP-L |
| Streptosporangium_roseum_{Actinobacteria}   | -----       | -----      | -----E    | IVDVFEFGVS | HAWYEDPFAA | GAFALFEPHQ |
| Roseiflexus_castenholzii_{Chloroflexi}      | -----       | -----      | -----Q    | IEEFEVGAS  | YMWHDDEFAG | GAFALFEPGQ |
| Bacillus_cereus_{Firmicutes}                | -----       | -----      | -----Q    | VYDEFISGIS | KSWTLDPYAL | GGFALFQAGQ |
| Marseillevirus                              | -----       | -----      | -----E    | RCSKMGVPE  | AKIELESVLF | YYHNHGAFW  |
|                                             |             |            |           |            |            |            |
| Aplysia_punctata_cyplasin_L_{Mollusks}      | FDDVMNT---  | --MRRPSLT- | ----DEVYV | VGADYSWGLI | SSWVEGALET | SYEVIDTYFK |
| Aplysia_punctata_cyplasin_S_{Mollusks}      | -----       | -----      | -----     | -----      | -----      | -----      |
| Aplysia_californica_aplysianin_A_{Mollusks} | FDDVMNT---  | --MRRPSLK- | ----DEVYV | VGADYAWGLM | SSWIEGSLET | TDAVLKEYFK |
| Aplysia_punctata_ink_toxin_1_{Mollusks}     | FDDVIST---  | --MRRPSLK- | ----DEVYV | VGADYSWGLI | SSWIEGALET | SENVINDYFL |
| Aplysia_punctata_ink_toxin_2_{Mollusks}     | FDDVIST---  | --MRRPSLK- | ----DEVYV | VGADYSWGLI | SSWIEGALET | SENVINDYFL |
| Aplysia_punctata_ink_toxin_3_{Mollusks}     | FDDVIST---  | --MRRPSLK- | ----DEVYV | VGADYSWGLI | SSWIEGALET | SENVINDYFL |
| Aplysia_californica_escapin_{Mollusks}      | FDDVIST---  | --MRRPSLK- | ----DEVYV | VGSDYSWGLI | SSWIEGALET | SENVINDYFL |
| Achatina_fulica_achacin_{Mollusks}          | CEYQYI---   | --IERPSLI- | ----DDVVF | VGSDHVNCIE | NAWTESAFLS | VENVFEKYF- |
| Hahella_chejuensis_{Proteobacteria}         | LDKIMRR---  | --MRHPVED- | ----QQIYI | VGEAYSY--D | QGWVEGALTV | AESTLEDFFA |
| Pseudomonas_entomophila_{Proteobacteria}    | VDLI IQK--- | --MRHPVKD- | ----QQVFI | VGEAYSY--G | QGWVEGALTT | AESALQEFFE |
| Burkholderia_ubonensis_{Proteobacteria}     | SWEVKHK---  | --IVQPIDG- | ----RPLFI | CGEAYS--A  | QGWVEGALQT | ADFLAKFGI  |
| Chromobacterium_violaceum_{Proteobacteria}  | SWEVKHA---  | --VVQPTD-  | ----LPLYI | CGEAYS--A  | QGWVEGALQT | AGYLLGKLGV |
| Chitinophaga_pinensis_{Bacteroidetes}       | SWEVRDK---  | --ITNPFAE- | ----IPLYI | CGEAYS--A  | QGWVEGALQT | AEIMLGKFLA |
| Flavobacterium_johnsoniae_{Bacteroidetes}   | VGDMVKY---  | --MRKPKHD- | ----EQIHI | CGEAYS--Q  | QGWVEGAFCE | AEKMLQDYFG |
| Dyadobacter_fermentans_{Bacteroidetes}      | VWDVMPY---  | --MRKPNAD- | ----ENIYV | VGEAYS--Q  | QGWVEGAFCE | AEKMLDHFQ  |
| Staphylococcus_aureus_{Firmicutes}          | VKEVMKE---  | --IRKPYFN- | ----ESIYI | VGEAYSS--D | QGWTEGAFKT | AENMLQDHFQ |
| Clostridium_botulinum_{Firmicutes}          | KTLFSYA---  | VTEPEMENK- | -----VFF  | AG-EHISQ-K | HVSQQGALQS | GMIANEVAK  |
| Clostridium_carboxidivorans_{Firmicutes}    | KRIFSHN---  | ILKPEYDNR- | -----VFF  | AG-EHTSA-T | HGWMQGALST | GKLAANSLVR |
| Turkey_LAO                                  | FTDYSQA---  | --LFEHEGR- | -----VHF  | AG-EHAAQ-P | HAWIDTSIKA | AVRAASNIHD |
| Chicken_LAO                                 | FTDYSQA---  | --LFEHEGR- | -----VHF  | AG-EHTAQ-P | HAWIDTSMKA | AVRAASNIHD |
| Zebrafinch_LAO                              | FVDYSRV---  | --LFAHEGR- | -----VHF  | AG-EHAAQ-P | PAWIDTAVKS | AVRAASNIHH |
| Ophiophagus_hannah_{Elapidae}               | ITHYSQM---  | --LAQNEGR- | -----IYF  | AG-EYTAH-P | HGWIETSMKS | AIREAINIHN |
| Crotalus_atrox_{Viperidae}                  | FQHFSEA---  | --LTAPFKR- | -----IYF  | AG-EYTAQ-F | HGWIDSTIKS | GLTAARDVNR |
| Sistrurus_catenatus_{Viperidae}             | FQHFSEA---  | --LTAPFNR- | -----IYF  | AG-EYTAQ-F | HGWIDSTIKS | GLTAARDVNR |
| Gloydeus_halys_{Viperidae}                  | FQHFSES---  | --LTASVDR- | -----IYF  | AG-EHTAE-A | HGWIDSTIKS | GLRAARDVNR |
| Trimesurus_stejnegeri_{Viperidae}           | FQHFSEA---  | --LTSHVDR- | -----IYF  | AG-EYTAH-A | HGWIDSSIKS | GLTAARDVNR |

|                                             |             |             |            |            |             |              |
|---------------------------------------------|-------------|-------------|------------|------------|-------------|--------------|
| Bothrops_jararacussu_{Viperidae}            | FQHFSEA---  | --LTAPVDR-  | -----IYF   | AG-EYTAQ-A | HGWIASTIKS  | GPEGL-DVNR   |
| Echis_ocellatus_{Viperidae}                 | FQDYSKA---  | --LTAPAGR-  | -----VYF   | AG-EYTAN-A | HGWIDSTIKS  | GLTAARDVNO   |
| Oxyuranus_scutellatus_{Elapidae}            | FQDFIER---  | --VAAPVGR-  | -----IYF   | AG-EYTAR-V | HGWL DSTIKS | GLTAARDVNR   |
| Pseudechis_australis_{Elapidae}             | FQDFFEI---  | --VAAPVGR-  | -----IYF   | AG-EYTAS-V | HGWL DSTIKS | GLTAARDVNL   |
| Bungarus_multicinctus_{Elapidae}            | FQDYSET---  | --VAAPVGR-  | -----IYF   | AG-EYTAR-V | HGWL DSTIKS | GLTAARDVNR   |
| Demancia_vestigiata_{Elapidae}              | FQEFYFET--- | --VAAPVGR-  | -----IYF   | AG-EYTAR-A | HGWIDSTIKS  | GLKAARDVNR   |
| Dog_LAO1                                    | FTDYSQE---  | --LFKPEGR-  | -----IHF   | AG-EHTSM-P | HGWIDTAIKS  | GLQAARNIQA   |
| Panda_LAO1                                  | FIDYSQE---  | --LFKPEGR-  | -----IHF   | AG-EHTSM-P | HGWIDTAIKS  | GLQAARNIQA   |
| Bovine_LAO1                                 | FVDYSQQ---  | --LFQPEGR-  | -----IHF   | AG-EHTCL-P | HAWIDTAIKS  | GLQVAKNIQA   |
| Horse_LAO1                                  | FADYSQQ---  | --LFQPEGR-  | -----IYF   | AG-EHTCL-P | HAWIDTAIKS  | GLQAARNIQA   |
| Mouse_LAO1                                  | FVDYSKQ---  | --LSQPEGR-  | -----IYF   | AG-EHTCL-P | HSWIDTAIKS  | GIRASCNIQA   |
| Opossum_LAO1                                | FVDYSRP---  | --LFEPEGK-  | -----IHF   | AG-EHTCQ-P | HGWIDTAIKS  | GLRASKNIQK   |
| Horse_LAO2                                  | YVDYARE---  | --LCKPEGR-  | -----VYF   | AG-EHTTL-P | HGWIDTAIKS  | GLRVAQSIQE   |
| Opossum_LAO2                                | YVDYSQE---  | --LFQPEGR-  | -----IHF   | AG-EHTTL-P | HGWIDTAIKS  | GLRAAQGIQE   |
| Flounder_LAO3                               | HVEYAKE---  | --LFQSEDR-  | -----LHF   | AG-EHTGF-P | HAWIDTAMKT  | GIRAAININK   |
| Flounder_LAO2                               | HLEYAKE---  | --LFKSEGR-  | -----LHF   | AG-EHTGF-P | HAWIETAMKT  | AIRAAINIYK   |
| Flounder_LAO1                               | HLEYSKE---  | --LFKSEGR-  | -----LHF   | AG-EHTGF-P | HAWIETAMKT  | GIRAATSIYS   |
| Rockfish_LAO                                | HLEFAKE---  | --LFRSEGR-  | -----VHF   | AG-EHTAF-P | HAWIEASLKS  | AIRAATNINK   |
| Green_pufferfish_LAO                        | PLQYSQH---  | --LSRSEGR-  | -----IHF   | AG-EHTAV-P | HAWMDTSMKS  | AVRVAANINR   |
| Zebrafish_LAO                               | MRDYSAS---  | --LVQNEGR-  | -----IYF   | AG-EHTAR-P | HGWIETAMKS  | ALRAADKIND   |
| Panda_IL4I1                                 | WPEDKEEGSD  | YDWA VPYGR- | -----IYF   | AG-EHTAY-P | HGWVETAVKS  | ALRAALLINS   |
| Dog_IL4I1                                   | WHEDREDGKD  | YNWAVPYGR-  | -----IYF   | AG-EHTAY-P | HGWVETAVKS  | ALRAAVLINS   |
| Human_IL4I1                                 | WQTEKDD---  | --WTVPYGR-  | -----IYF   | AG-EHTAY-P | HGWVETAVKS  | ALRAAIKINS   |
| Mouse_IL4I1                                 | YGREAEED--- | YDWSAPFGR-  | -----IYF   | AG-EHTAL-P | HGWVETAVKS  | GLRAAVRINN   |
| Streptosporangium_roseum_{Actinobacteria}   | QTTLHEA---  | --IIQPEGR-  | -----VHF   | AG-EHCSL-W | HAWIEGALES  | GLRAAAAIHD   |
| Roseiflexus_castenholzii_{Chloroflexi}      | QTTLLHDA--- | --IVKPEGR-  | -----FHF   | AD-EHASL-Y | HAWIQGAVDS  | GLRAAMAVHR   |
| Bacillus_cereus_{Firmicutes}                | ESELQPA---  | --IVKPEGR-  | -----IFF   | AG-DHTTL-Y | HGWIQGAIES  | GIFVAMEVNE   |
| Marseillevirus                              | KAGGYRD---  | --LTKIREN-  | -----VSV   | IGSAISMS-- | PGWVNGALQS  | SEGV LK KYGI |
|                                             |             |             |            |            |             |              |
| Aplysia_punctata_cyplasin_L_{Mollusks}      | SERSHNVQPP  | SHMASHVG--  | -----      | -----      | -----       | -----        |
| Aplysia_punctata_cyplasin_S_{Mollusks}      | -----       | -----       | -----      | -----      | -----       | -----        |
| Aplysia_californica_aplysianin_A_{Mollusks} | AECR-DFPNN  | NHLGSHMA--  | -----      | -----      | -----       | -----        |
| Aplysia_punctata_ink_toxin_1_{Mollusks}     | -----       | -----       | -----      | -----      | -----       | -----        |
| Aplysia_punctata_ink_toxin_2_{Mollusks}     | -----       | -----       | -----      | -----      | -----       | -----        |
| Aplysia_punctata_ink_toxin_3_{Mollusks}     | -----       | -----       | -----      | -----      | -----       | -----        |
| Aplysia_californica_escapin_{Mollusks}      | -----       | -----       | -----      | -----      | -----       | -----        |
| Achatina_fulica_achacin_{Mollusks}          | -----       | -----       | -----      | -----      | -----       | -----        |
| Hahella_chejuensis_{Proteobacteria}         | MSRPSWLPPE  | QQFSLMPVPS  | PDGCAESCDC | LTCDDCKKVL | DEVTQFAYKG  | IDNVEG----   |
| Pseudomonas_entomophila_{Proteobacteria}    | LPRPSWLP--  | ASYQLLPTPA  | PEEIDYSKPP | MPAHP-AQVL | DGITQNICAG  | IKP-----     |
| Burkholderia_ubonensis_{Proteobacteria}     | GAL-----    | -----       | -----      | -----      | -----       | -----        |
| Chromobacterium_violaceum_{Proteobacteria}  | SAFPR-----  | -----       | -----      | -----      | -----       | -----        |
| Chitinophaga_pinensis_{Bacteroidetes}       | PSANAKQTNN  | VSQIQPS---  | -----      | -----      | -----       | -----        |
| Flavobacterium_johnsoniae_{Bacteroidetes}   | LKRPFWLPDN  | YYLGW----   | -----      | -----      | -----       | -----        |
| Dyadobacter_fermentans_{Bacteroidetes}      | LTRPHWLNDR  | YYMGW----   | -----      | -----      | -----       | -----        |
| Staphylococcus_aureus_{Firmicutes}          | LNWPDWLEKE  | YYLGW----   | -----      | -----      | -----       | -----        |
| Clostridium_botulinum_{Firmicutes}          | QIKAN-----  | -----       | -----      | -----      | -----       | -----        |
| Clostridium_carboxidivorans_{Firmicutes}    | SVKAERKM--  | -----       | -----      | -----      | -----       | -----        |

|                                             |            |            |            |            |            |            |
|---------------------------------------------|------------|------------|------------|------------|------------|------------|
| Turkey_LAO                                  | DS-----    | -----      | -----      | -----      | -ETQNLN--- | LNLEGFVEKG |
| Chicken_LAO                                 | DS-----    | -----      | -----      | -----      | -ETRNLSPNH | VHLESFVEKG |
| Zebrafinch_LAO                              | ES-----    | -----      | -----      | -----      | -AEAPGR--- | -GFGRVQRE  |
| Ophiophagus_hannah_{Elapidae}               | A-----     | -----      | -----      | -----      | -----      | -----      |
| Crotalus_atrox_{Viperidae}                  | AS-----    | -----      | -----      | -----      | -ENPSGI--- | ----HLSNDN |
| Sistrurus_catenatus_{Viperidae}             | AS-----    | -----      | -----      | -----      | -ENPSGI--- | ----HLSNDN |
| Gloydeus_halys_{Viperidae}                  | AS-----    | -----      | -----      | -----      | -EQ-----   | -----      |
| Trimesurus_stejnegeri_{Viperidae}           | AS-----    | -----      | -----      | -----      | -ENPSGI--- | ----HLSNDN |
| Bothrops_jararacussu_{Viperidae}            | AS-----    | -----      | -----      | -----      | -E-----    | -----      |
| Echis_ocellatus_{Viperidae}                 | AS-----    | -----      | -----      | -----      | -EL-----   | -----      |
| Oxyuranus_scutellatus_{Elapidae}            | AS-----    | -----      | -----      | -----      | -QKPSRR--- | ----QLSNDN |
| Pseudechis_australis_{Elapidae}             | AS-----    | -----      | -----      | -----      | -QKPSRI--- | ----QLSNDN |
| Bungarus_multicinctus_{Elapidae}            | AS-----    | -----      | -----      | -----      | -QKPSRI--- | ----HLSNDN |
| Demancia_vestigiata_{Elapidae}              | AS-----    | -----      | -----      | -----      | -QKPSRI--- | ----QLSNDN |
| Dog_LAO1                                    | AV-----    | -----      | -----      | -----      | -DEEATGKQT | TFTYS----- |
| Panda_LAO1                                  | -----      | -----      | -----      | -----      | -----      | -----      |
| Bovine_LAO1                                 | AV-----    | -----      | -----      | -----      | -DKEITER-- | -----      |
| Horse_LAO1                                  | AV-----    | -----      | -----      | -----      | -DQEAMGRHK | TFTNNQSPS- |
| Mouse_LAO1                                  | AV-----    | -----      | -----      | -----      | -DKEATRGT  | AL-----    |
| Opossum_LAO1                                | AI-----    | -----      | -----      | -----      | -DALSEAHND | TDLFHGVVDD |
| Horse_LAO2                                  | SA-----    | -----      | -----      | -----      | -DLALTKGPR | DSKEPHSKTE |
| Opossum_LAO2                                | TV-----    | -----      | -----      | -----      | -GL-LKQDKE | ARKENGPRNE |
| Flounder_LAO3                               | EL-----    | -----      | -----      | -----      | -NDVST---  | -----      |
| Flounder_LAO2                               | EL-----    | -----      | -----      | -----      | -NCVFT---  | -----      |
| Flounder_LAO1                               | NL-----    | -----      | -----      | -----      | -LDVSTQTRD | EF-----    |
| Rockfish_LAO                                | ES-----    | -----      | -----      | -----      | -ARSPHDEL- | -----      |
| Green_pufferfish_LAO                        | AA-----    | -----      | -----      | -----      | -LRRPRSSDL | LSGAAAKNAN |
| Zebrafish_LAO                               | DV-----    | -----      | -----      | -----      | -K-----    | -----      |
| Panda_IL4I1                                 | RK-----    | --EHALVDSD | AE-----    | ---EGVVRL  | VPSRP----- | --RCGFRKGG |
| Dog_IL4I1                                   | RE-----    | --EHTWSDSN | SE-----    | ---EGLVHL  | VPNHPRLVPH | HPRCEFQKGG |
| Human_IL4I1                                 | RK-----    | --GPASDTAS | PEGHSD---  | -MEGQGHVHG | VASSP----- | --SHDLAKEE |
| Mouse_IL4I1                                 | NYGYGEVDPQ | MMEHAYAEAN | YLDQYPEGER | PEEQQAREEV | SPDEQEPSHK | HLLVETSPEG |
| Streptosporangium_roseum_{Actinobacteria}   | GPS-----   | -----      | -----      | -----      | -----      | -----      |
| Roseiflexus_castenholzii_{Chloroflexi}      | AA-----    | -----      | -----      | -----      | -----      | -----      |
| Bacillus_cereus_{Firmicutes}                | -----      | -----      | -----      | -----      | -----      | -----      |
| Marseillevirus                              | PSVLQP---  | -----      | -----      | -----      | -----      | -----      |
| Aplysia_punctata_cyplasin_L_{Mollusks}      | -----      | -----      | -----      | -----      | -----      | -----      |
| Aplysia_punctata_cyplasin_S_{Mollusks}      | -----      | -----      | -----      | -----      | -----      | -----      |
| Aplysia_californica_aplysianin_A_{Mollusks} | -----      | -----      | -----      | -----      | -----      | -----      |
| Aplysia_punctata_ink_toxin_1_{Mollusks}     | -----      | -----      | -----      | -----      | -----      | -----      |
| Aplysia_punctata_ink_toxin_2_{Mollusks}     | -----      | -----      | -----      | -----      | -----      | -----      |
| Aplysia_punctata_ink_toxin_3_{Mollusks}     | -----      | -----      | -----      | -----      | -----      | -----      |
| Aplysia_californica_escapin_{Mollusks}      | -----      | -----      | -----      | -----      | -----      | -----      |
| Achatina_fulica_achacin_{Mollusks}          | -----      | -----      | -----      | -----      | -----      | -----      |
| Hahella_chejuensis_{Proteobacteria}         | -----      | -----      | -----      | -----      | -----      | -----      |
| Pseudomonas_entomophila_{Proteobacteria}    | -----      | -----      | -----      | -----      | -----      | -----      |

|                                            |            |            |             |            |            |            |
|--------------------------------------------|------------|------------|-------------|------------|------------|------------|
| Burkholderia_ubonensis_{Proteobacteria}    | -----      | -----      | -----       | -----      | -----      | -----      |
| Chromobacterium_violaceum_{Proteobacteria} | -----      | -----      | -----       | -----      | -----      | -----      |
| Chitinophaga_pinensis_{Bacteroidetes}      | -----      | -----      | -----       | -----      | -----      | -----      |
| Flavobacterium_johnsoniae_{Bacteroidetes}  | -----      | -----      | -----       | -----      | -----      | -----      |
| Dyadobacter_fermentans_{Bacteroidetes}     | -----      | -----      | -----       | -----      | -----      | -----      |
| Staphylococcus_aureus_{Firmicutes}         | -----      | -----      | -----       | -----      | -----      | -----      |
| Clostridium_botulinum_{Firmicutes}         | -----      | -----      | -----       | -----      | -----      | -----      |
| Clostridium_carboxidivorans_{Firmicutes}   | -----      | -----      | -----       | -----      | -----      | -----      |
| Turkey_LAO                                 | EL-----    | -----      | -----       | -----      | -----      | -----      |
| Chicken_LAO                                | EL-----    | -----      | -----       | -----      | -----      | -----      |
| Zebrafinch_LAO                             | EL-----    | -----      | -----       | -----      | -----      | -----      |
| Ophiophagus_hannah_{Elapidae}              | -----      | -----      | -----       | -----      | -----      | -----      |
| Crotalus_atrox_{Viperidae}                 | EF-----    | -----      | -----       | -----      | -----      | -----      |
| Sistrurus_catenatus_{Viperidae}            | EF-----    | -----      | -----       | -----      | -----      | -----      |
| Gloydeus_halys_{Viperidae}                 | -----      | -----      | -----       | -----      | -----      | -----      |
| Trimesurus_stejnegeri_{Viperidae}          | EL-----    | -----      | -----       | -----      | -----      | -----      |
| Bothrops_jararacussu_{Viperidae}           | -----      | -----      | -----       | -----      | -----      | -----      |
| Echis_ocellatus_{Viperidae}                | -----      | -----      | -----       | -----      | -----      | -----      |
| Oxyuranus_scutellatus_{Elapidae}           | EL-----    | -----      | -----       | -----      | -----      | -----      |
| Pseudechis_australis_{Elapidae}            | EL-----    | -----      | -----       | -----      | -----      | -----      |
| Bungarus_multicinctus_{Elapidae}           | QL-----    | -----      | -----       | -----      | -----      | -----      |
| Demancia_vestigiata_{Elapidae}             | EL-----    | -----      | -----       | -----      | -----      | -----      |
| Dog_LAO1                                   | -----      | -----      | -----       | -----      | -----      | -----      |
| Panda_LAO1                                 | -----      | -----      | -----       | -----      | -----      | -----      |
| Bovine_LAO1                                | -----      | -----      | -----       | -----      | -----      | -----      |
| Horse_LAO1                                 | -----      | -----      | -----       | -----      | -----      | -----      |
| Mouse_LAO1                                 | -----      | -----      | -----       | -----      | -----      | -----      |
| Opossum_LAO1                               | YDAKDSYDSN | VALDEGSFLF | LESKGGKPQEV | CSSKSSH--- | -----      | -----      |
| Horse_LAO2                                 | LQPTS----  | -----      | -----       | -----      | -----      | -----      |
| Opossum_LAO2                               | L-----     | -----      | -----       | -----      | -----      | -----      |
| Flounder_LAO3                              | -----      | -----      | -----       | -----      | -----      | -----      |
| Flounder_LAO2                              | -----      | -----      | -----       | -----      | -----      | -----      |
| Flounder_LAO1                              | -----      | -----      | -----       | -----      | -----      | -----      |
| Rockfish_LAO                               | -----      | -----      | -----       | -----      | -----      | -----      |
| Green_pufferfish_LAO                       | RDGEY----  | -----      | -----       | -----      | -----      | -----      |
| Zebrafish_LAO                              | -----      | -----      | -----       | -----      | -----      | -----      |
| Panda_IL4I1                                | ATDAPAAQSL | TAR-----   | -----HT     | THKRPEH--- | -----      | -----      |
| Dog_IL4I1                                  | ATHSPGEHRI | TVR-----   | -----HS     | THKRAEH--- | -----      | -----      |
| Human_IL4I1                                | GSHPPVQQQL | SLQ-----   | -----NT     | THTRTSH--- | -----      | -----      |
| Mouse_IL4I1                                | QQHAFVEAIP | ELQGHVVFET | VPQEKGHAHQ  | NIYPSEHVQV | HGEVIPEWHG | HGGSGTPQMH |
| Streptosporangium_roseum_{Actinobacteria}  | -----      | -----      | -----       | -----      | -----      | -----      |
| Roseiflexus_castenholzii_{Chloroflexi}     | -----      | -----      | -----       | -----      | -----      | -----      |
| Bacillus_cereus_{Firmicutes}               | -----      | -----      | -----       | -----      | -----      | -----      |
| Marseillevirus                             | -----      | -----      | -----       | -----      | -----      | -----      |
| <br>                                       |            |            |             |            |            |            |
| Aplysia_punctata_cyplasin_L_{Mollusks}     | -----      | -----      | -----       | -----      | -----      | -----      |
| Aplysia_punctata_cyplasin_S_{Mollusks}     | -----      | -----      | -----       | -----      | -----      | -----      |

Aplysia\_californica\_aplysianin\_A\_{Mollusks} -----  
Aplysia\_punctata\_ink\_toxin\_1\_{Mollusks} -----  
Aplysia\_punctata\_ink\_toxin\_2\_{Mollusks} -----  
Aplysia\_punctata\_ink\_toxin\_3\_{Mollusks} -----  
Aplysia\_californica\_escapin\_{Mollusks} -----  
Achatina\_fulica\_achacin\_{Mollusks} -----  
Hahella\_chejuensis\_{Proteobacteria} -----  
Pseudomonas\_entomophila\_{Proteobacteria} -----  
Burkholderia\_ubonensis\_{Proteobacteria} -----  
Chromobacterium\_violaceum\_{Proteobacteria} -----  
Chitinophaga\_pinensis\_{Bacteroidetes} -----  
Flavobacterium\_johnsoniae\_{Bacteroidetes} -----  
Dyadobacter\_fermentans\_{Bacteroidetes} -----  
Staphylococcus\_aureus\_{Firmicutes} -----  
Clostridium\_botulinum\_{Firmicutes} -----  
Clostridium\_carboxidivorans\_{Firmicutes} -----  
Turkey\_LAO -----  
Chicken\_LAO -----  
Zebrafinch\_LAO -----  
Ophiophagus\_hannah\_{Elapidae} -----  
Crotalus\_atrox\_{Viperidae} -----  
Sistrurus\_catenatus\_{Viperidae} -----  
Gloydeus\_halys\_{Viperidae} -----  
Trimesurus\_stejnegeri\_{Viperidae} -----  
Bothrops\_jararacussu\_{Viperidae} -----  
Echis\_ocellatus\_{Viperidae} -----  
Oxyuranus\_scutellatus\_{Elapidae} -----  
Pseudechis\_australis\_{Elapidae} -----  
Bungarus\_multicinctus\_{Elapidae} -----  
Demancia\_vestigiata\_{Elapidae} -----  
Dog\_LAO1 -----  
Panda\_LAO1 -----  
Bovine\_LAO1 -----  
Horse\_LAO1 -----  
Mouse\_LAO1 -----  
Opossum\_LAO1 -----  
Horse\_LAO2 -----  
Opossum\_LAO2 -----  
Flounder\_LAO3 -----  
Flounder\_LAO2 -----  
Flounder\_LAO1 -----  
Rockfish\_LAO -----  
Green\_pufferfish\_LAO -----  
Zebrafish\_LAO -----  
Panda\_IL4I1 -----  
Dog\_IL4I1 -----  
Human\_IL4I1 -----

|                                           |        |
|-------------------------------------------|--------|
| Mouse_IL4I1                               | RVGDHS |
| Streptosporangium_roseum_{Actinobacteria} | -----  |
| Roseiflexus_castenholzii_{Chloroflexi}    | -----  |
| Bacillus_cereus_{Firmicutes}              | -----  |
| Marseillevirus                            | -----  |
